# Supplementary material for: Description of a new species of cryptic snubnose darter (Percidae: Etheostomatinae) endemic to north-central Mississippi
Source: PeerJ journal article supplement (doi:10.7717/peerj.9807), 2020-08-31
Supplement: Sterling_Supplement_Final.pdf [file Sterling_Supplement_Final.pdf]

# Description of a New Species of Cryptic Snubnose Darter (Percidae: Etheostomatinae) Endemic to North-Central Mississippi

Ken A. Sterling<sup>1\*</sup> and Melvin L. Warren, Jr<sup>1</sup>.

<sup>1</sup>USDA Forest Service, Southern Research Station, Stream Ecology Laboratory, 1000 Front Street, Oxford, MS 38655

\**corresponding author*: [kenneth.a.sterling@usda.gov](mailto:kenneth.a.sterling@usda.gov)

Supplemental tables and figures

Table S1. Estimated stream gradients and watershed area for Yazoo Darters in the Yocona (Y.R.) and Little Tallahatchie (L.T.R.) river drainages. Data is for all streams yielding Yazoo Darters but not including collections from the mainstem L.T.R. or Otoucalofa Creek (see Sterling et al., 2013); U.T. = unnamed tributary, Cr. = creek

| Drainage | Stream                | Lat.   | Long.   | Area (km <sup>2</sup> ) | Gradient |
|----------|-----------------------|--------|---------|-------------------------|----------|
| Y.R.     | U.T. Otoucalofa Cr. 2 | 34.141 | -89.589 | 3.43                    | 0.920    |
| Y.R.     | Mill Cr.              | 34.166 | -89.52  | 5.6                     | 0.933    |
| Y.R.     | Moore Cr.             | 34.156 | -89.548 | 8.1                     | 0.958    |
| Y.R.     | Shippy Cr.            | 34.153 | -89.433 | 8.7                     | 0.681    |
| Y.R.     | U.T. Otoucalofa Cr. 1 | 34.125 | -89.61  | 10.1                    | 0.874    |
| Y.R.     | Gordon Branch         | 34.14  | -89.549 | 12.3                    | 1.139    |
| Y.R.     | Morris Cr.            | 34.283 | -89.544 | 13.5                    | 0.555    |
| Y.R.     | Spring Cr.            | 34.153 | -89.529 | 13.9                    | 0.876    |
| Y.R.     | Smith Cr. B           | 34.138 | -89.474 | 13.9                    | 0.587    |
| Y.R.     | Smith Cr. A           | 34.168 | -89.438 | 17.2                    | 0.802    |
| Y.R.     | Johnston Cr.          | 34.123 | -89.641 | 24.3                    | 0.472    |
| Y.R.     | Taylor Cr.            | 34.296 | -89.588 | 29.4                    | 0.597    |
| Y.R.     | Splinter Cr.          | 34.235 | -89.635 | 37.4                    | 0.480    |
| Y.R.     | Pumpkin Cr.           | 34.327 | -89.397 | 39.5                    | 0.511    |
| Y.R.     | Yellow Leaf Cr.       | 34.375 | -89.421 | 84.4                    | 0.562    |
| Y.R.     | Tarvers Cr.           | 34.251 | -89.489 | 26.1                    | 0.730    |
| Y.R.     | U.T. Yocona River     | 34.273 | -89.412 | 3.97                    | 1.138    |
| Y.R.     | Kettle Cr.            | 34.3   | -89.33  | 37.2                    | 0.442    |
| Y.R.     | Long Branch           | 34.099 | -89.803 | 37                      | 0.482    |
| L.T.R.   | U.T. Tippah River 3   | 34.661 | -89.288 | 4.43                    | 1.306    |
| L.T.R.   | U.T. Tippah River1    | 34.691 | -89.29  | 12.7                    | 0.820    |
| L.T.R.   | U.T. Tippah River 2   | 34.709 | -89.256 | 12.8                    | 0.979    |
| L.T.R.   | Sorghum Cr.           | 34.707 | -89.071 | 16                      | 0.728    |
| L.T.R.   | Gray Cr.              | 34.719 | -89.086 | 17.8                    | 0.482    |
| L.T.R.   | Rhoden Cr.            | 34.756 | -89.169 | 22                      | 0.682    |
| L.T.R.   | Bagley Cr.            | 34.503 | -89.413 | 27.5                    | 0.634    |
| L.T.R.   | Fice Cr.              | 34.438 | -89.253 | 28.9                    | 0.414    |
| L.T.R.   | Graham Mill Cr.       | 34.503 | -89.491 | 31.2                    | 0.449    |
| L.T.R.   | Wagner Cr.            | 34.768 | -89.229 | 32.9                    | 0.462    |
| L.T.R.   | Mitchell Cr.          | 34.483 | -89.203 | 34.4                    | 0.349    |
| L.T.R.   | Yellow Rabbit Cr.     | 34.774 | -89.145 | 41.9                    | 0.452    |
| L.T.R.   | Chilli Cr.            | 34.682 | -89.173 | 48.8                    | 0.341    |

|        |                        |        |         |       |       |
|--------|------------------------|--------|---------|-------|-------|
| L.T.R. | Shelby Cr.             | 34.751 | -89.102 | 49.6  | 0.230 |
| L.T.R. | Oak Chewalla Cr.       | 34.582 | -89.511 | 56.8  | 0.615 |
| L.T.R. | Lee Cr.                | 34.513 | -89.49  | 58.2  | 0.433 |
| L.T.R. | Little Spring Cr.      | 34.642 | -89.464 | 58.6  | 0.389 |
| L.T.R. | Mill Cr.               | 34.525 | -89.25  | 60.3  | 0.374 |
| L.T.R. | Puskus Cr.             | 34.411 | -89.375 | 66.4  | 0.325 |
| L.T.R. | Bowling Branch         | 34.769 | -88.997 | 66.4  | 0.482 |
| L.T.R. | Hurricane Cr.          | 34.425 | -89.496 | 76.1  | 0.399 |
| L.T.R. | Blackwater Cr.         | 34.569 | -89.61  | 82.9  | 0.546 |
| L.T.R. | Cypress Cr.            | 34.394 | -89.287 | 84.6  | 0.341 |
| L.T.R. | Hotopha Cr. (Deer Cr.) | 34.316 | -89.785 | 89    | 0.345 |
| L.T.R. | Big Snow Cr.           | 34.773 | -89.252 | 97.7  | 0.348 |
| L.T.R. | Chewalla Cr.           | 34.673 | -89.332 | 118.6 | 0.340 |
| L.T.R. | Big Spring Cr.         | 34.634 | -89.397 | 119.7 | 0.311 |

Table S2. Diversity of clade Adonia snubnose darters showing described species, Evolutionary Significant Units (ESU), and undescribed but recognized forms; superscripts indicate possible cryptic diversity and citations, <sup>1</sup> = Storey (2003), Gabel (2007); <sup>2</sup> = Kozal et al. (2017); <sup>3</sup> = Boschung and Mayden (2004); <sup>4</sup> = Brogdon et al. (2003); colors correspond to unranked clades from Near et al. (2011).

|    | Species                                    | Common Name                       |
|----|--------------------------------------------|-----------------------------------|
| 1  | <i>Etheostoma scotti</i>                   | Cherokee Darter (upper ESU)       |
| 2  | <i>Etheostoma scotti</i>                   | Cherokee Darter (middle ESU)      |
| 3  | <i>Etheostoma scotti</i>                   | Cherokee Darter (lower ESU)       |
| 4  | <i>Etheostoma coosae</i> <sup>1</sup>      | Coosa Darter                      |
| 5  | <i>Etheostoma duryi</i>                    | Black Darter                      |
| 6  | <i>Etheostoma flavum</i>                   | Saffron Darter                    |
| 7  | <i>Etheostoma etnieri</i>                  | Cherry Darter                     |
| 8  | <i>Etheostoma raneyi</i>                   | Yazoo Darter                      |
| 9  | <i>Etheostoma faulkneri</i>                | Yoknapatawpha Darter              |
| 10 | <i>Etheostoma zonistium</i> <sup>2</sup>   | Bandfin Darter                    |
| 11 | <i>Etheostoma cyanoprosopum</i>            | Blueface Darter                   |
| 12 | <i>Etheostoma cf. zonistium</i>            | Bandfin Darter: Hatchie River     |
| 13 | <i>Etheostoma cervus</i>                   | Chickasaw Darter                  |
| 14 | <i>Etheostoma pyrrhogaster</i>             | Firebelly Darter                  |
| 15 | <i>Etheostoma brevirostrum</i>             | Holiday Darter: Shoal Creek       |
| 16 | <i>Etheostoma cf. brevirostrum 1</i>       | Holiday Darter Amicalola River    |
| 17 | <i>Etheostoma cf. brevirostrum 2</i>       | Holiday Darter: Conasauga River   |
| 18 | <i>Etheostoma cf. brevirostrum 3</i>       | Holiday Darter: Coosawattee River |
| 19 | <i>Etheostoma cf. brevirostrum 4</i>       | Holiday Darter: Etowah River      |
| 20 | <i>Etheostoma ramseyi</i> <sup>3</sup>     | Alabama Darter                    |
| 21 | <i>Etheostoma tallapoosae</i> <sup>4</sup> | Tallapoosa Darter                 |
| 22 | <i>Etheostoma colorosum</i>                | Coastal Darter                    |
| 23 | <i>Etheostoma lachneri</i> <sup>3</sup>    | Tombigbee Darter                  |
| 24 | <i>Etheostoma bellator</i>                 | Warrior Darter                    |
| 25 | <i>Etheostoma cf. bellator 1</i>           | Warrior Darter: Sipsey Fork       |
| 26 | <i>Etheostoma cf. bellator 2</i>           | Warrior Darter: Locust Fork       |
| 27 | <i>Etheostoma chermocki</i>                | Vermilion Darter                  |

Table S3. Compilation of all known sites of occurrence for Yoknapatawpha Darters in the Yocona River (Y.R.) and Otoucalofa Creek (O.C.) watersheds; many sites have been sampled through time and the table does not reflect a complete compilation of all known sample records; Smith Creek A and Smith Creek B are different tributaries to Otoucalofa Creek; summer 1999 and summer 2012 indicates multiple samples over the summer; Cr. = creek, U.T. = unnamed tributary, SRS = USDA Forest Service, Southern Research Station (Oxford, MS).

| Watershed | Stream                | Lat.   | Long.   | Date        | Source                             |
|-----------|-----------------------|--------|---------|-------------|------------------------------------|
| O.C.      | Gordon Branch         | 34.14  | -89.549 | 6/15/1989   | Suttkus et al., 1994               |
| O.C.      | Johnson Cr.           | 34.123 | -89.641 | 6/19/2009   | Sterling et al., 2013              |
| O.C.      | Mill Cr.              | 34.166 | -89.52  | 6/18/2009   | Sterling et al., 2013              |
| O.C.      | Moore Cr.             | 34.156 | -89.548 | 6/18/2009   | Sterling et al., 2013              |
| O.C.      | Otoucalofa Cr.        | 34.133 | -89.412 | 7/8/1985    | Ross et al., 2001                  |
| O.C.      | Otoucalofa Cr.        | 34.162 | -89.512 | 5/14/1986   | Ross et al., 2001                  |
| O.C.      | Shippy Cr.            | 34.153 | -89.433 | 7/10/1985   | Ross et al., 2001                  |
| O.C.      | Smith Cr. A           | 34.168 | -89.438 | 10/10/1985  | Ross et al., 2001                  |
| O.C.      | Smith Cr. A           | 34.171 | -89.439 | 10/10/1985  | Ross et al., 2001                  |
| O.C.      | Smith Cr. B           | 34.138 | -89.474 | 7/23/1985   | Ross et al., 2001                  |
| O.C.      | Spring Cr.            | 34.153 | -89.529 | 6/30/2009   | Sterling et al., 2013              |
| O.C.      | U.T. Otoucalofa Cr. 2 | 34.141 | -89.589 | 6/14/1989   | Suttkus et al., 1994               |
| O.C.      | U.T. Otoucalofa Cr. 1 | 34.125 | -89.61  | 6/19/2009   | Sterling et al., 2013              |
| Y.R.      | Kettle Cr.            | 34.3   | -89.33  | summer 1999 | Adams & Warren 2005                |
| Y.R.      | Long Branch           | 34.099 | -89.803 | 9/6/2015    | Hubbell et al., 2020               |
| Y.R.      | Morris Cr.            | 34.3   | -89.549 | 3/24/1993   | Johnston & Haag 1996               |
| Y.R.      | Morris Cr.            | 34.283 | -89.544 | 9/24/1993   | Johnston & Haag 1996               |
| Y.R.      | Pumpkin Cr.           | 34.327 | -89.397 | 5/24/1952   | Suttkus et al., 1994               |
| Y.R.      | Pumpkin Cr.           | 34.339 | -89.384 | 6/11/1999   | Sterling et al., 2013              |
| Y.R.      | Pumpkin Cr.           | 34.286 | -89.445 | 5/6/1974    | Suttkus et al., 1994               |
| Y.R.      | U.T. Pumpkin Cr.      | 34.291 | -89.44  | 6/30/2009   | Sterling et al., 2013              |
| Y.R.      | Splinter Cr.          | 34.235 | -89.635 | 10/10/2017  | S. Adams, 2017, person. comm.      |
| Y.R.      | Splinter Cr.          | 34.25  | -89.642 | 10/10/2017  | S. Adams, 2017, person. comm.      |
| Y.R.      | Tarvers Cr.           | 34.251 | -89.489 | 5/10/2018   | A. Carson, 2018, person. comm.     |
| Y.R.      | Taylor Cr.            | 34.271 | -89.58  | 8/20/1991   | Ross et al., 2001                  |
| Y.R.      | Taylor Cr.            | 34.296 | -89.588 | 3/23/2018   | K. Sterling, 2018, person. observ. |
| Y.R.      | U.T. Taylor Cr.       | 34.123 | -89.641 | 5/11/1988   | Suttkus et al., 1994               |
| Y.R.      | U.T. Taylor Cr.       | 34.293 | -89.588 | 3/23/2018   | K. Sterling, 2018, person. observ. |
| Y.R.      | Yellow Leaf Cr.       | 34.375 | -89.421 | 6/9/1999    | Sterling et al., 2013              |
| Y.R.      | Yellow Leaf Cr.       | 34.379 | -89.413 | 6/9/1999    | Sterling et al., 2013              |
| Y.R.      | Yellow Leaf Cr.       | 34.396 | -89.404 | 4/12/1988   | Ross et al., 2001                  |

|      |                   |        |         |             |                                       |
|------|-------------------|--------|---------|-------------|---------------------------------------|
| Y.R. | Yellow Leaf Cr.   | 34.368 | -89.429 | summer 2012 | M. Bland, 2019, person. communication |
| Y.R. | U.T. Yocona River | 34.273 | -89.412 | summer 2012 | M. Bland, 2019, person. communication |

***Male nuptial color photographs:*** All fishes were photographed immediately after capture and then released (except for six type specimen vouchers). The photographs are presented in the same order with the same labels as were shown to colleagues for color scoring (see Methods section). A key (after the photographs) indicates which drainage individuals were sampled from.

Male nuptial color photographs; credit for all photographs: Ken Sterling

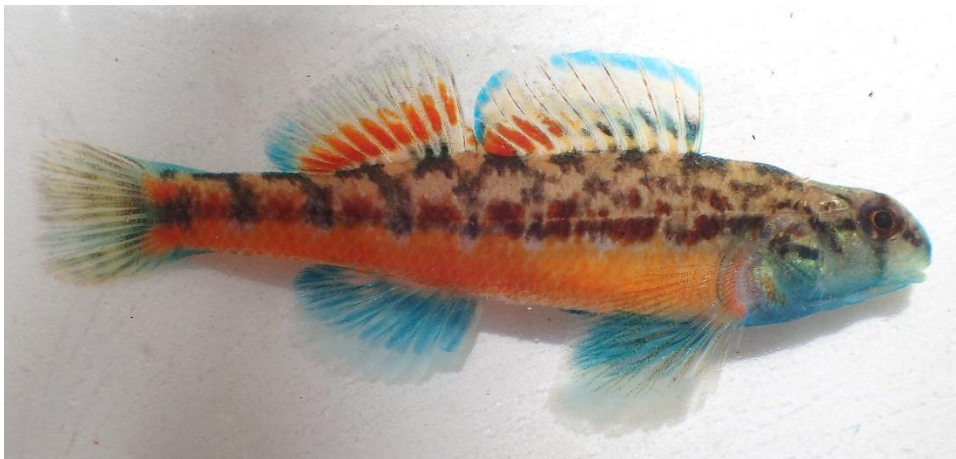

YD\_1

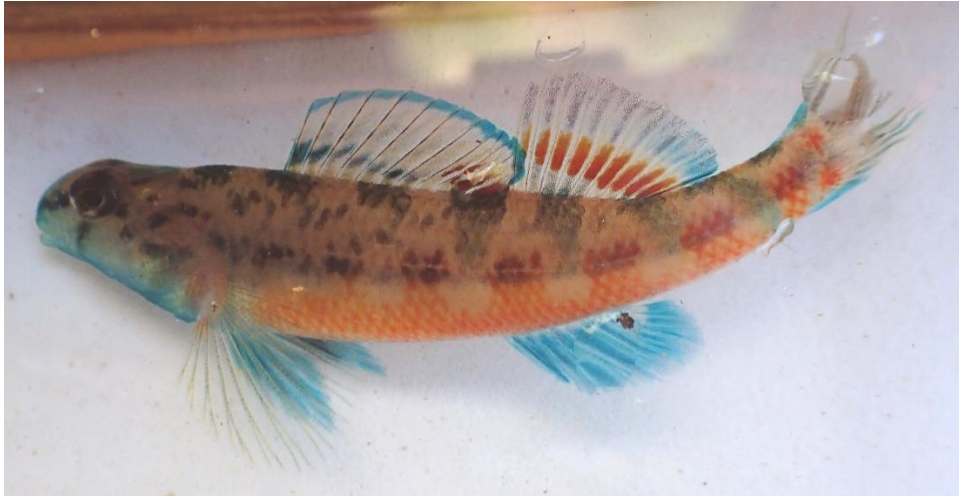

YD\_2

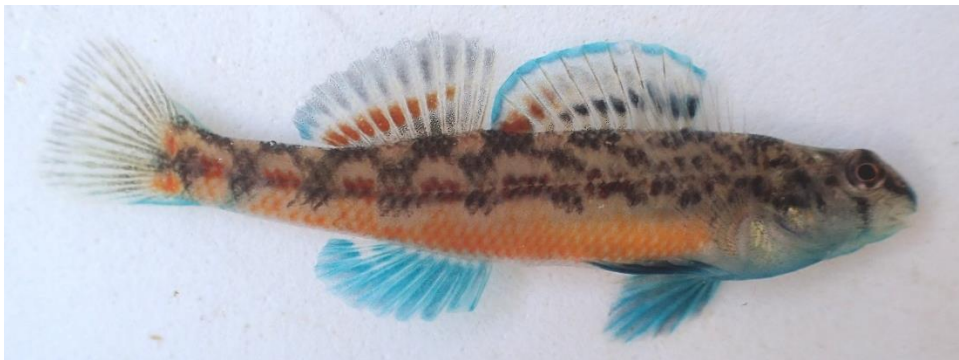

YD\_3

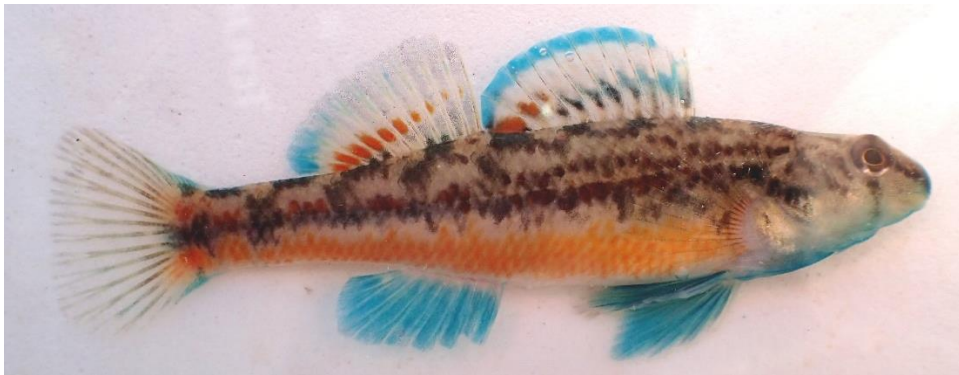

YD\_4

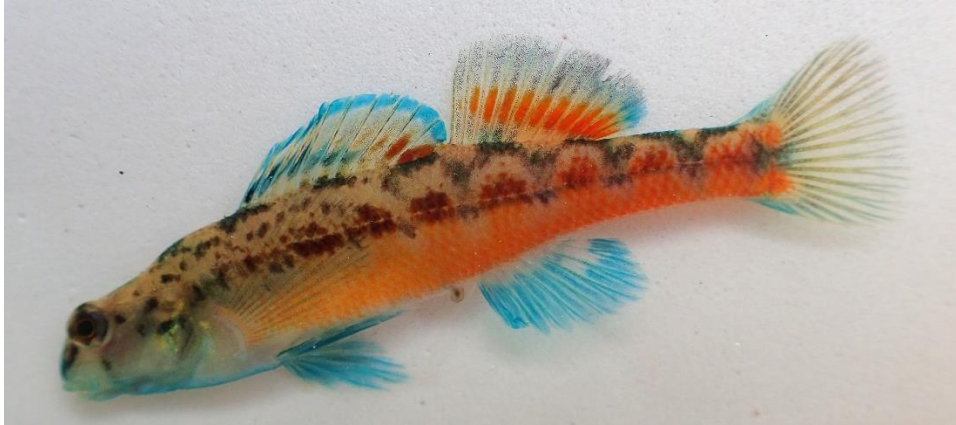

YD\_5

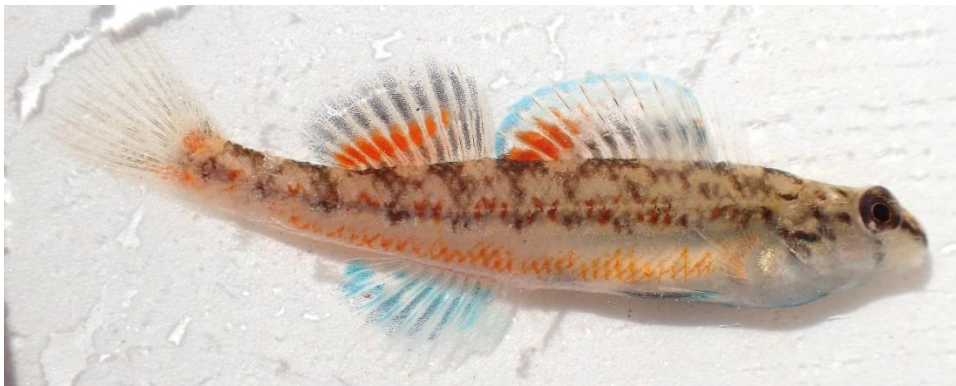

YD\_6

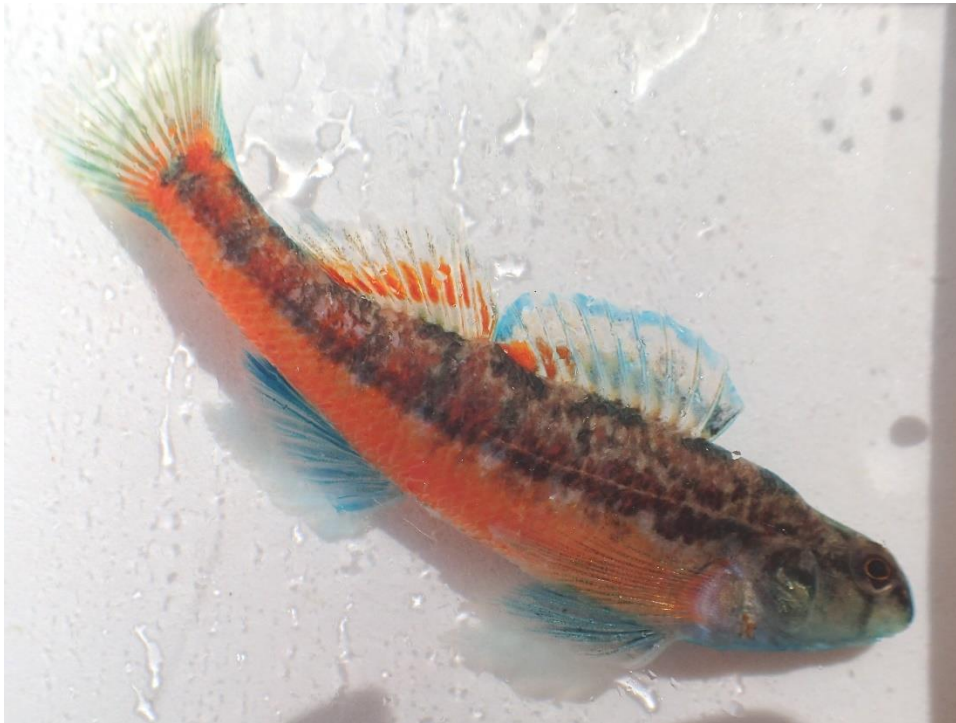



YD\_7

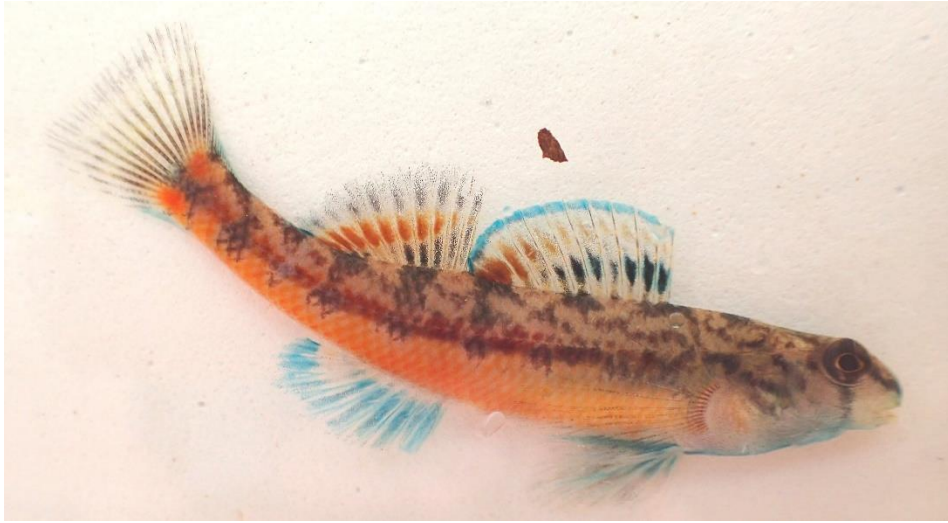

YD\_8

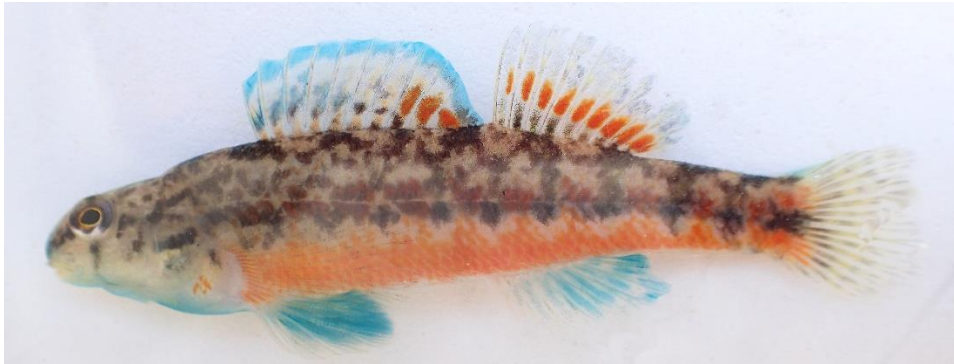

YD\_9

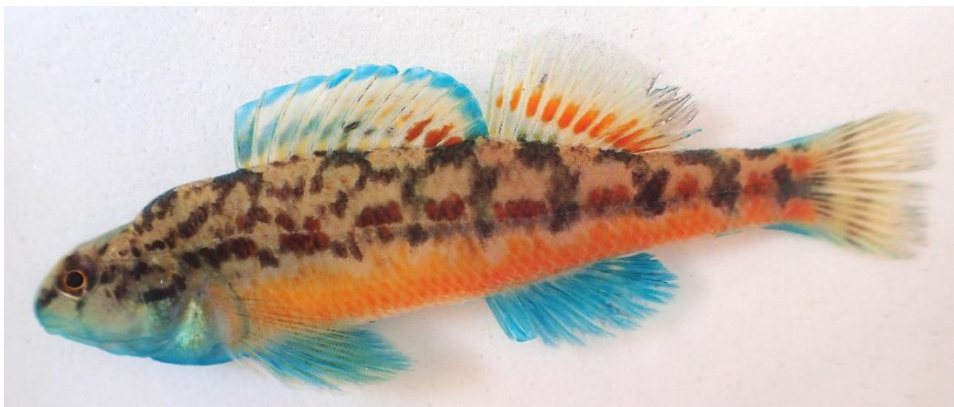

YD\_10

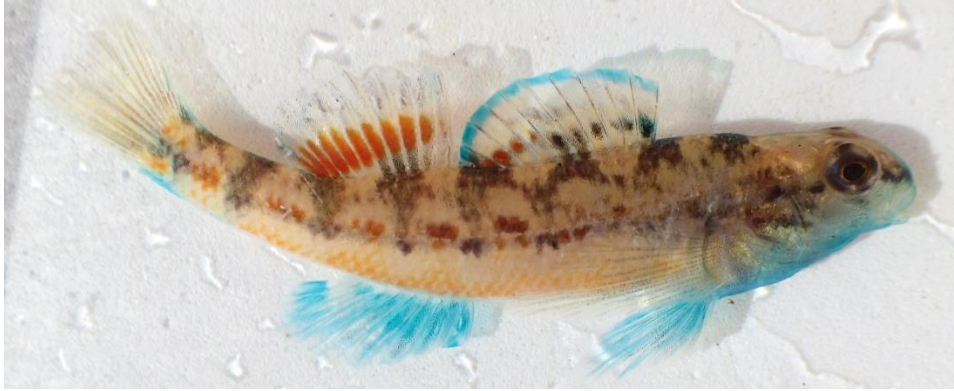

YD\_11

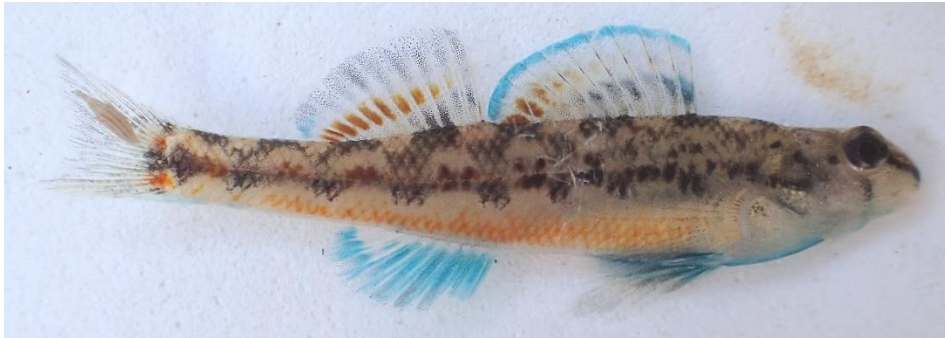

YD\_12

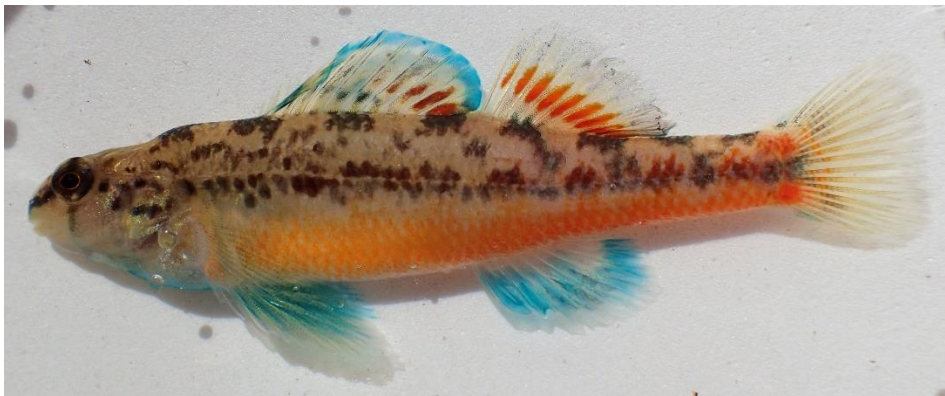

YD\_13

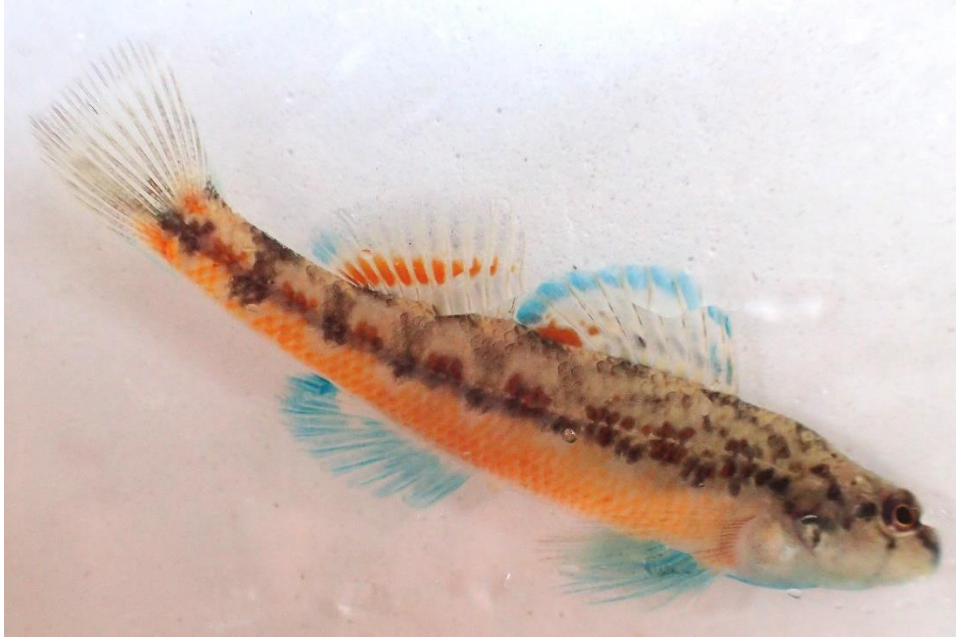

YD\_14

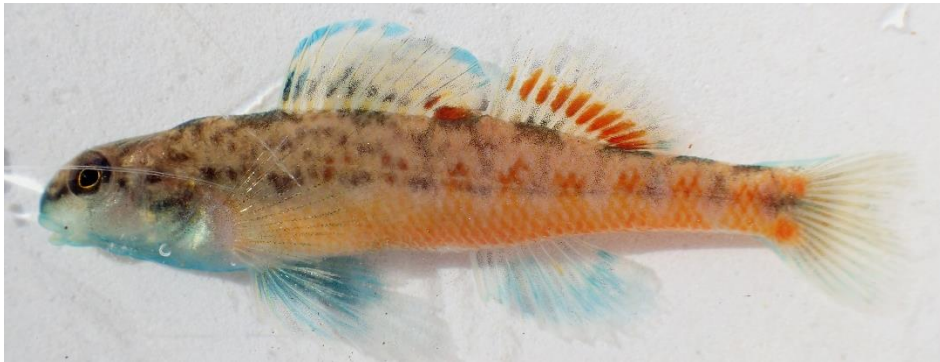

YD\_15

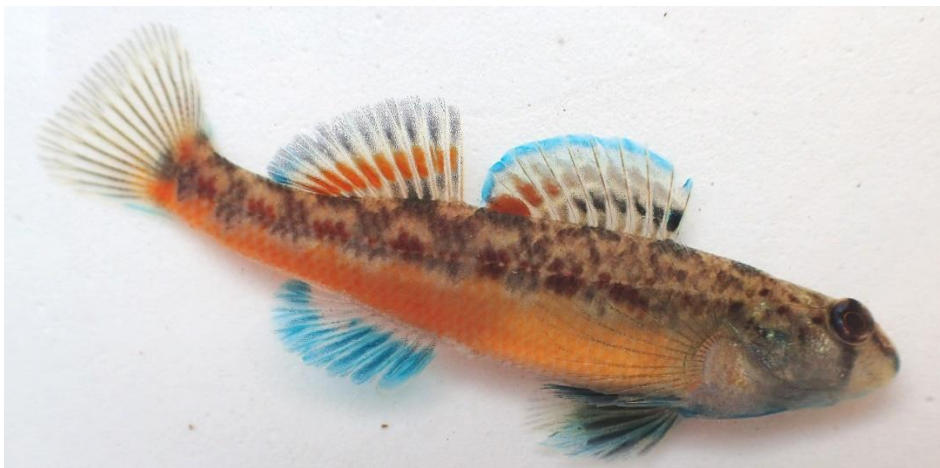

YD\_16

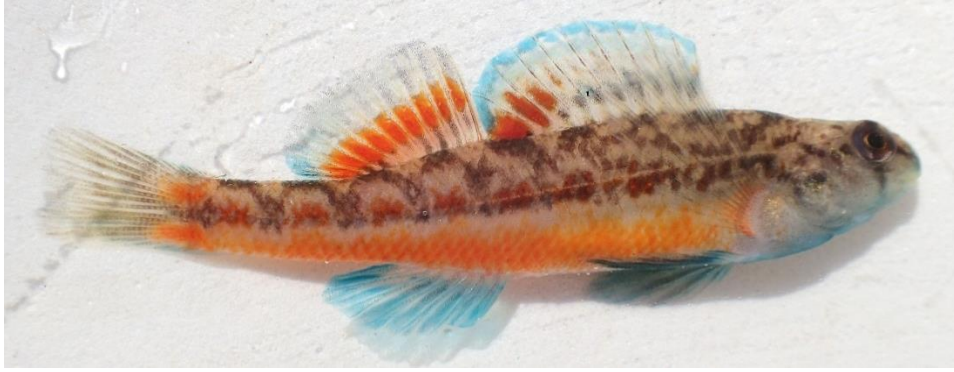

YD\_17

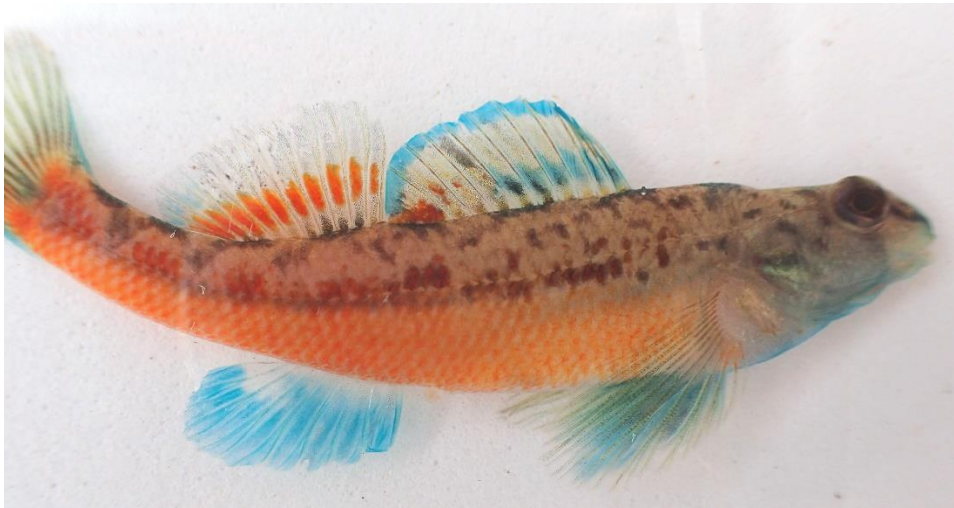

YD\_18

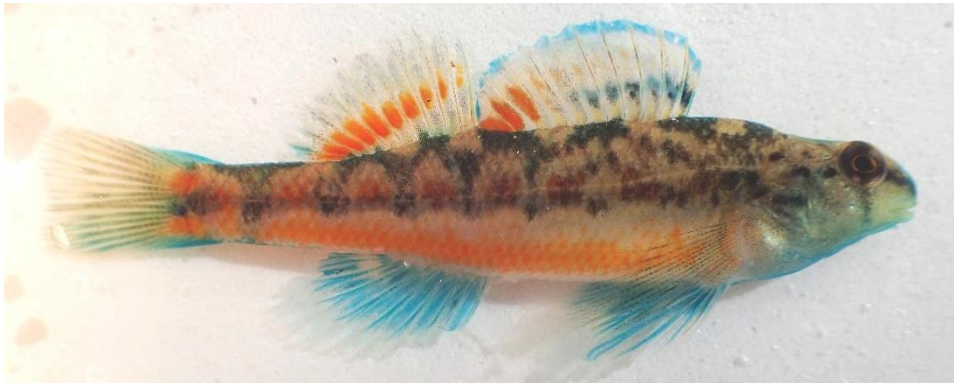

YD\_19

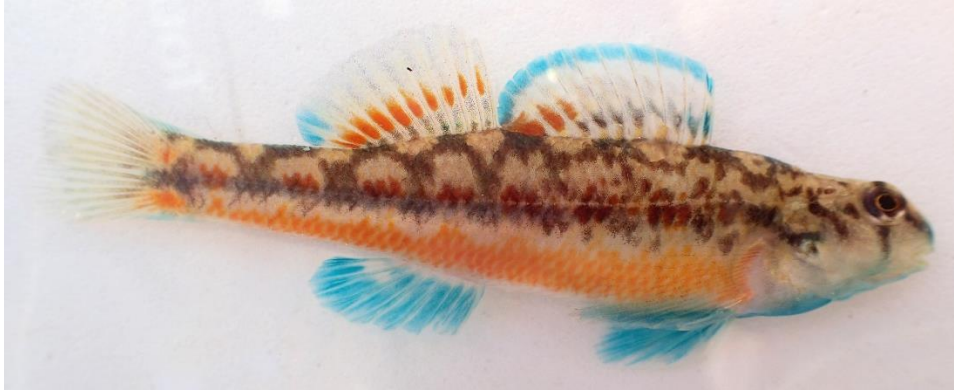

YD\_20

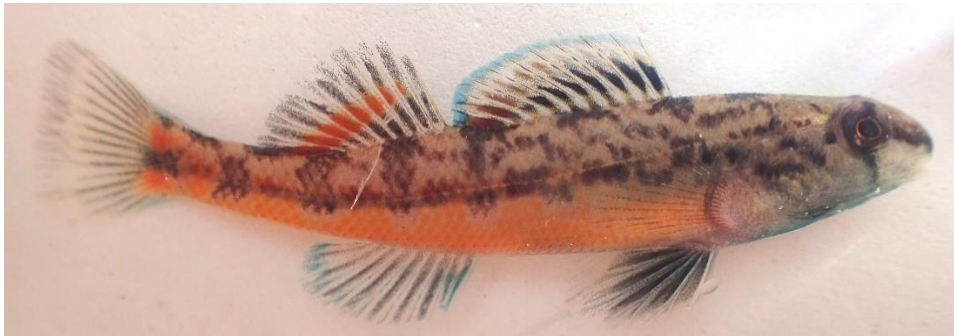

YD\_21

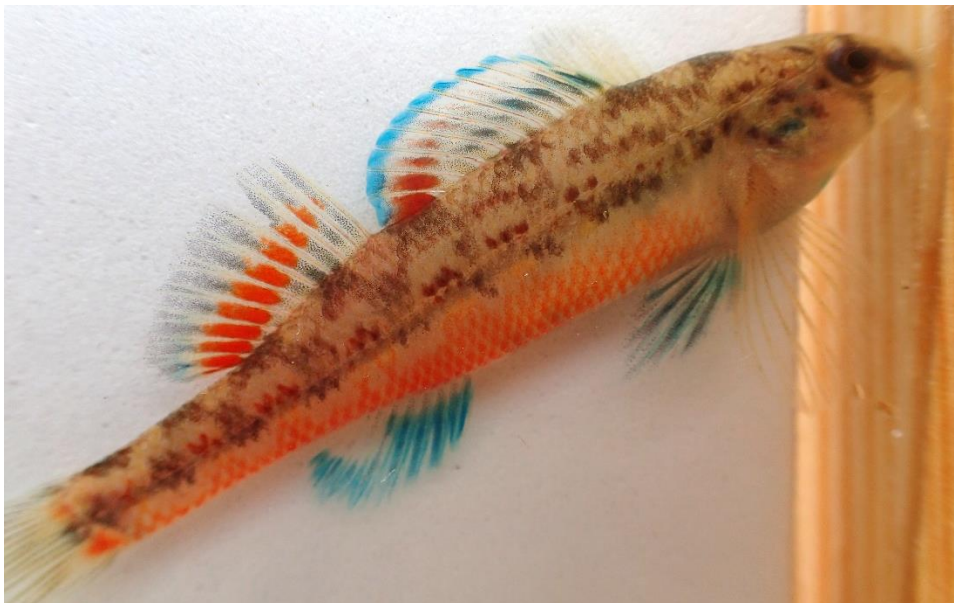

YD\_22

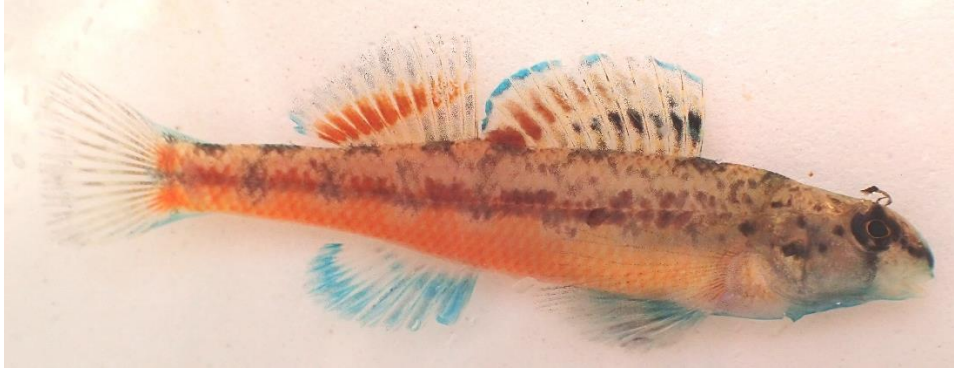

YD\_23

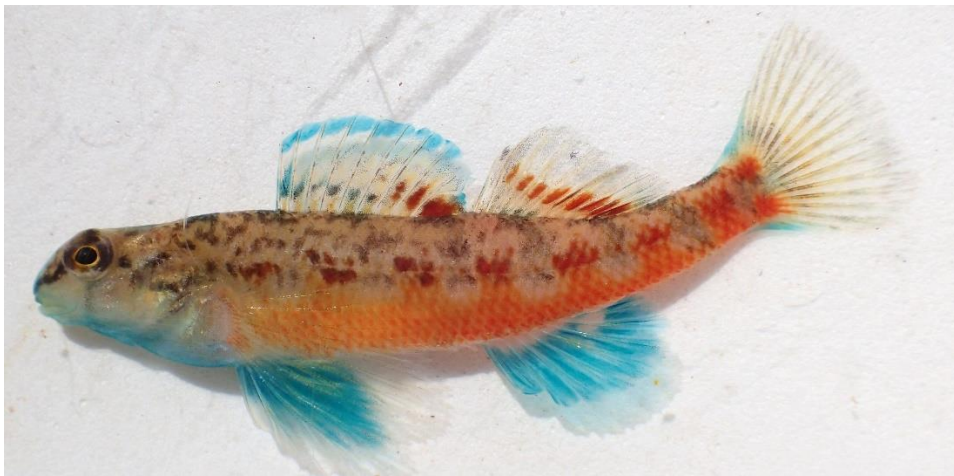

YD\_24

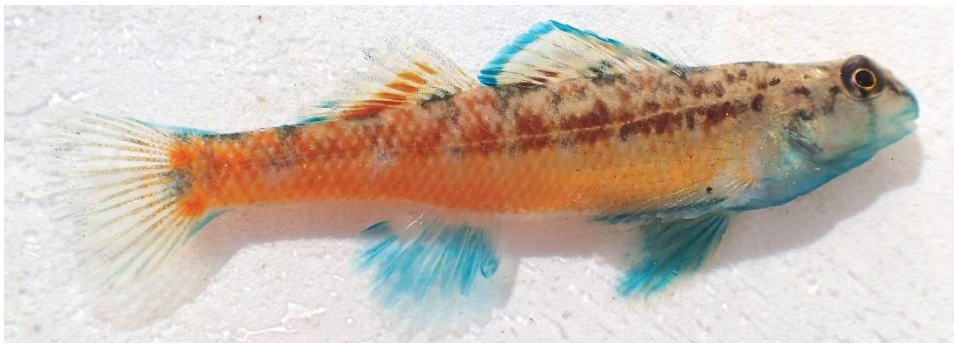

YD\_25

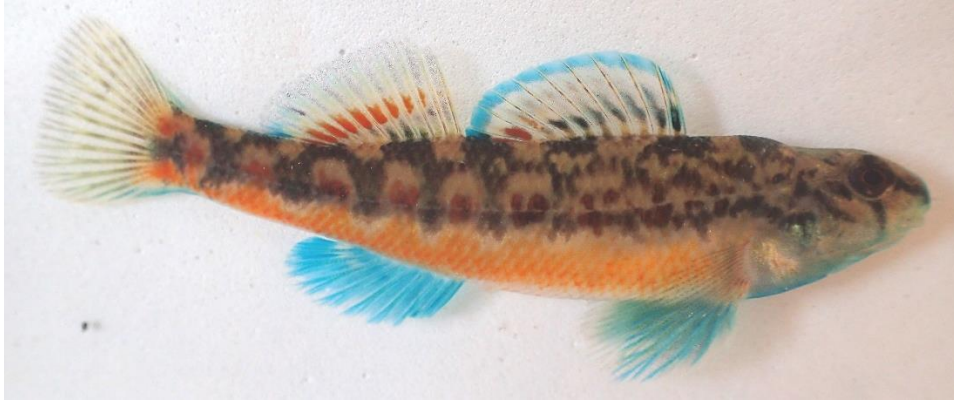

YD\_26

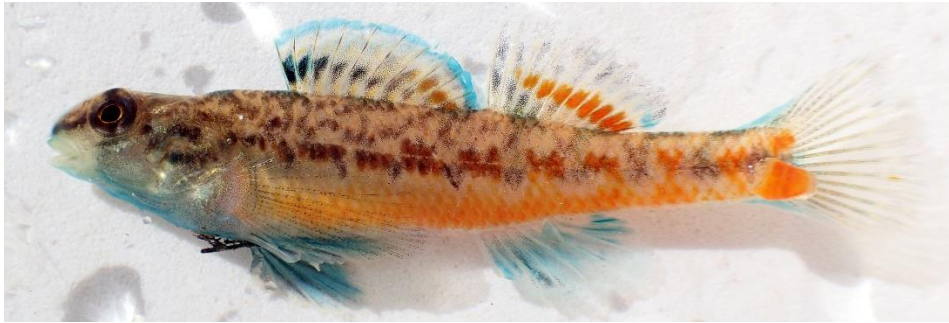

YD\_27

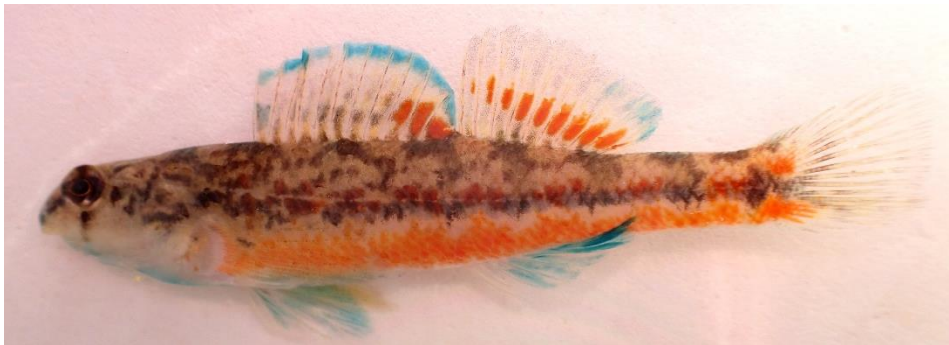

YD\_28

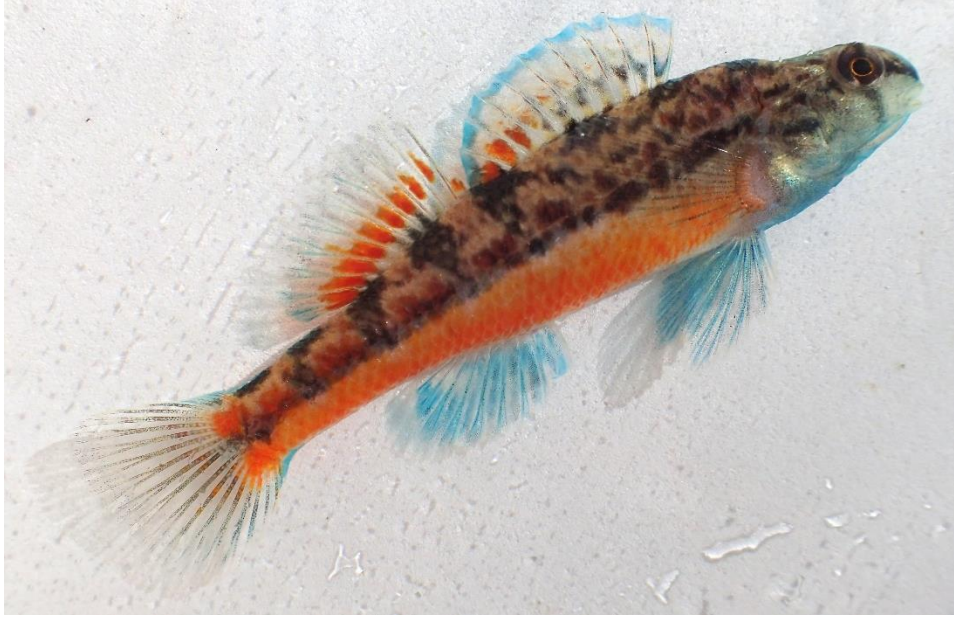

YD\_29

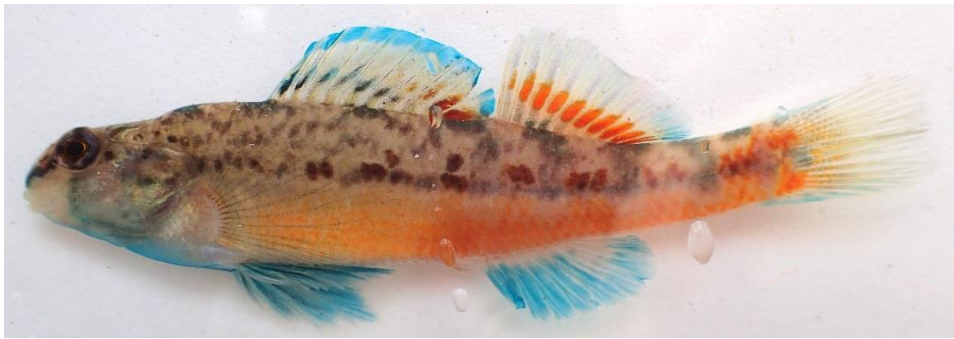

YD\_30

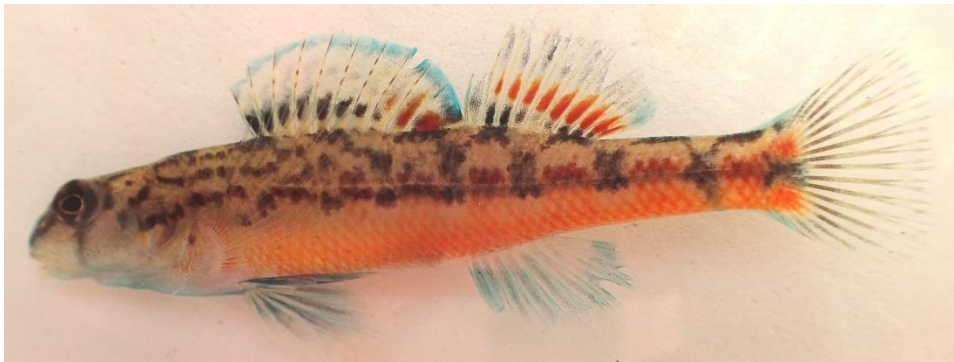

YD\_31



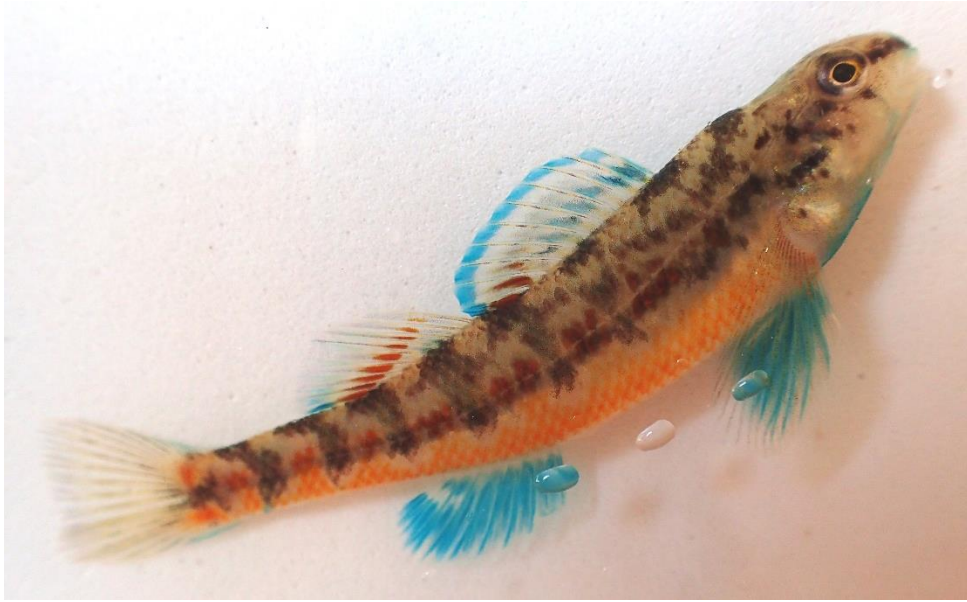

YD\_32

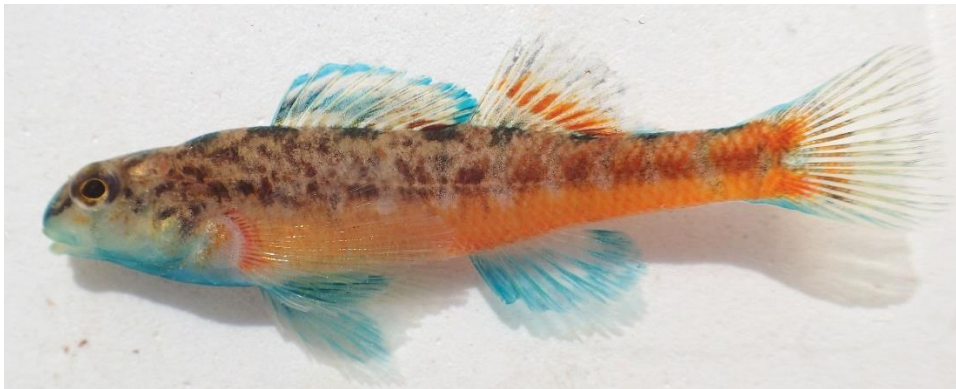

YD\_33

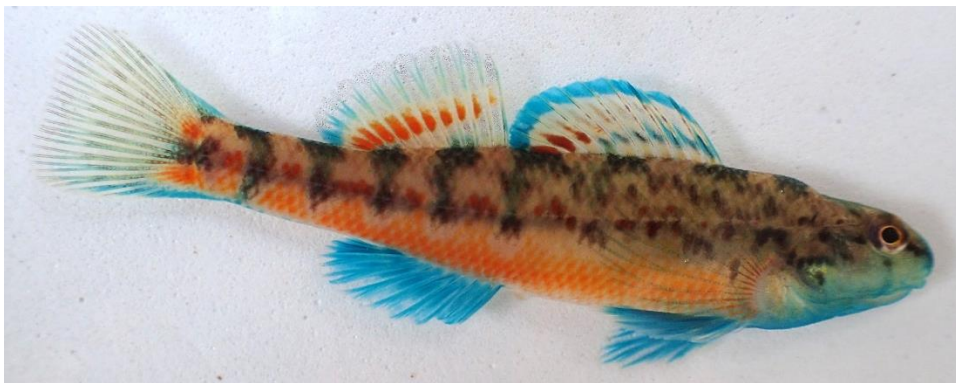

YD\_34

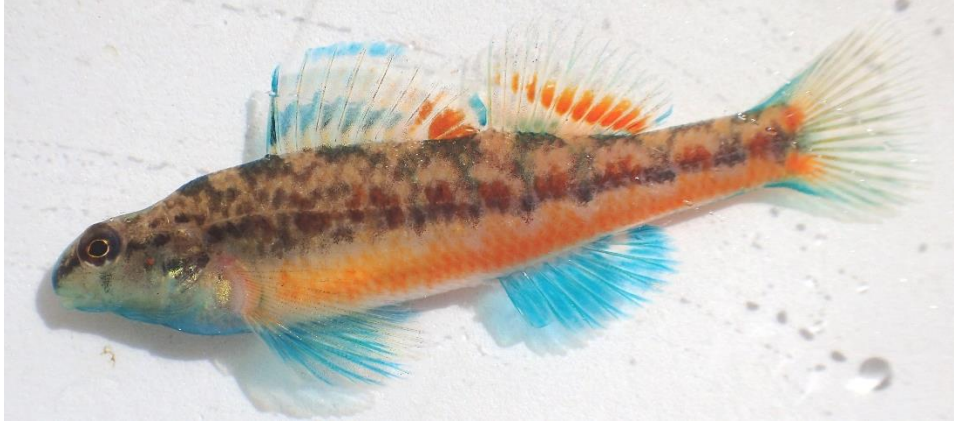

YD\_35

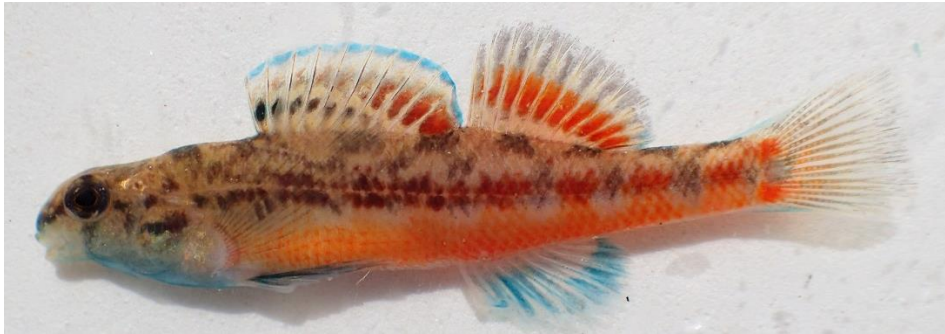

YD\_36

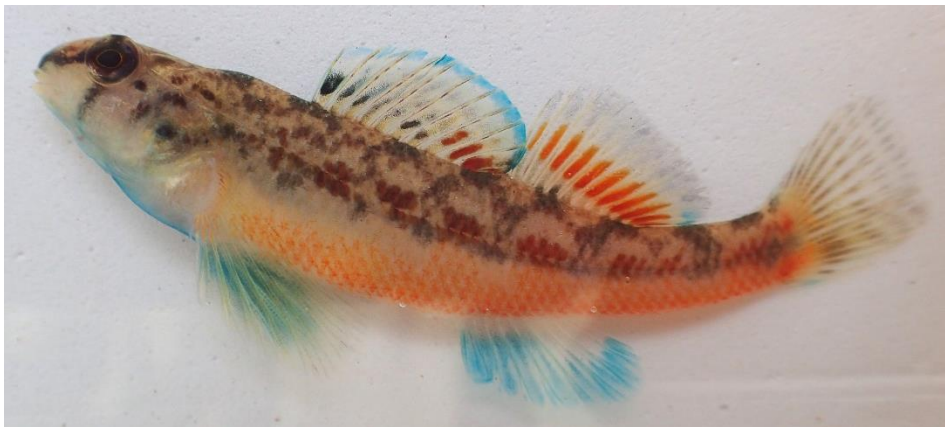

YD\_37

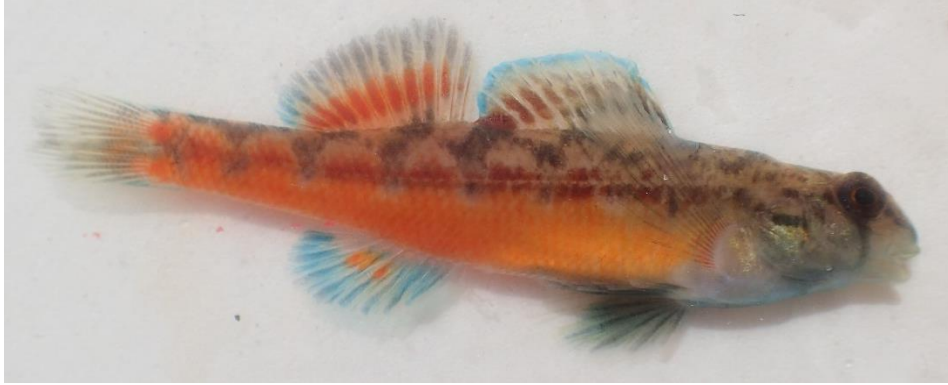

YD\_38

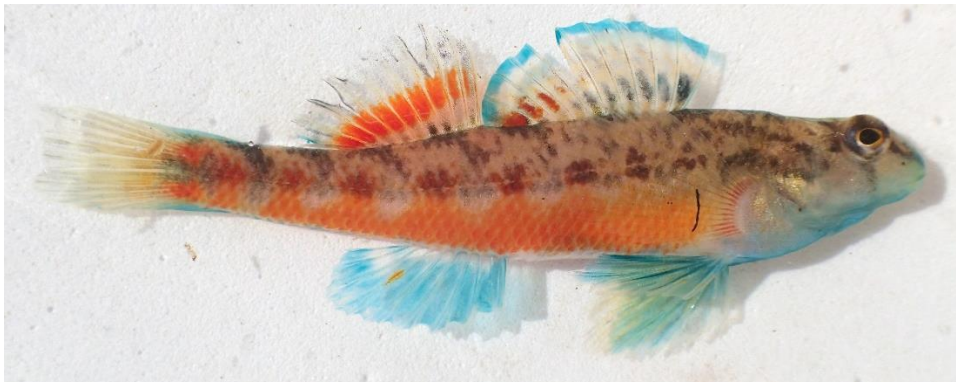

YD\_39

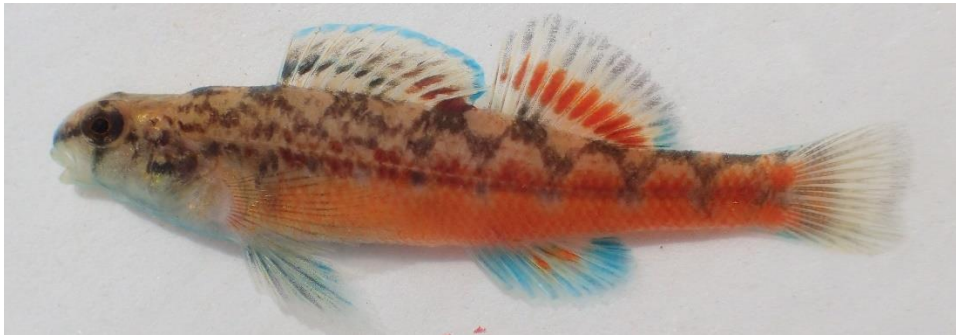

YD\_40

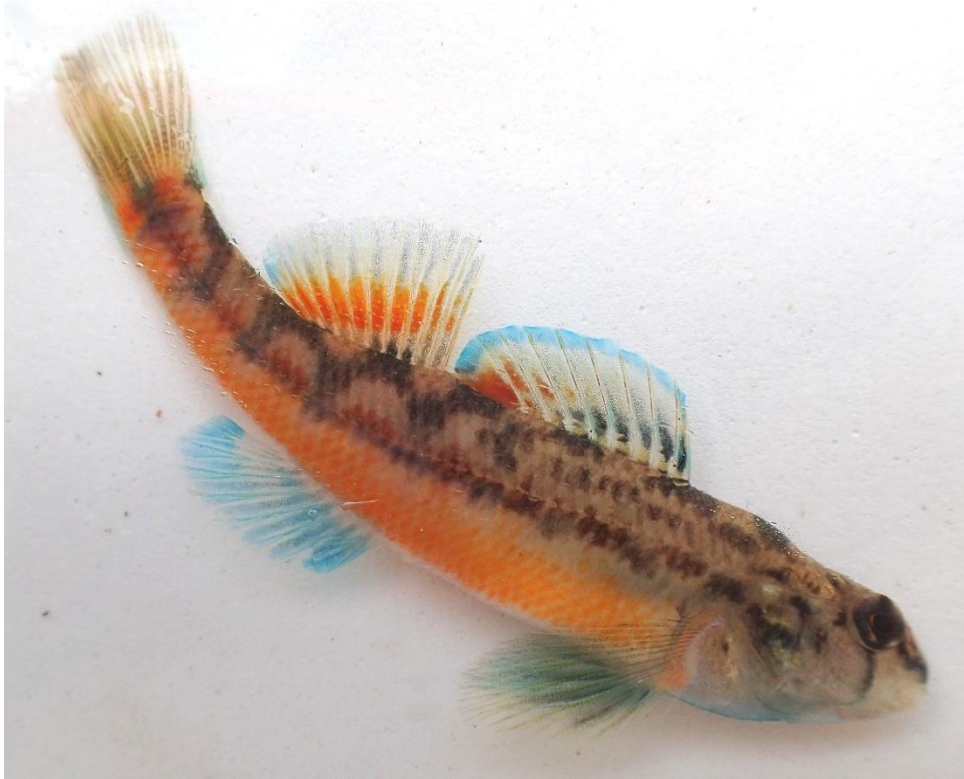

YD\_41

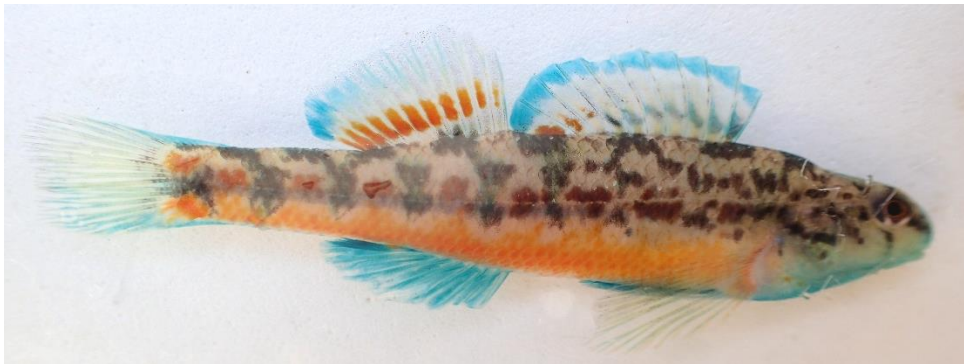

YD\_42

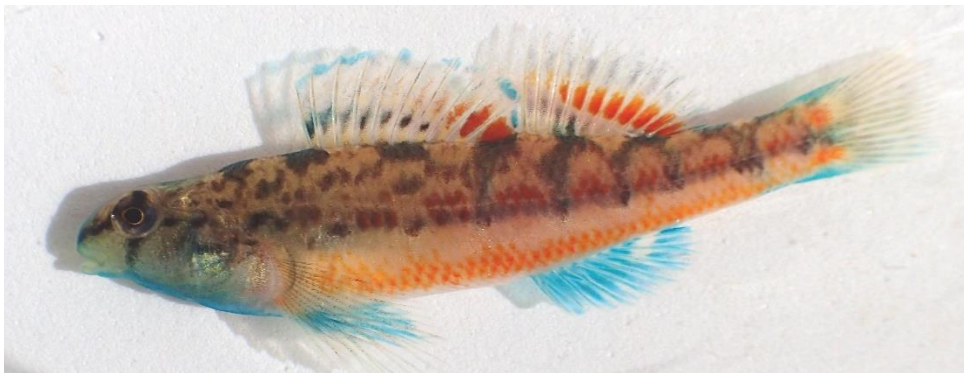

YD\_43

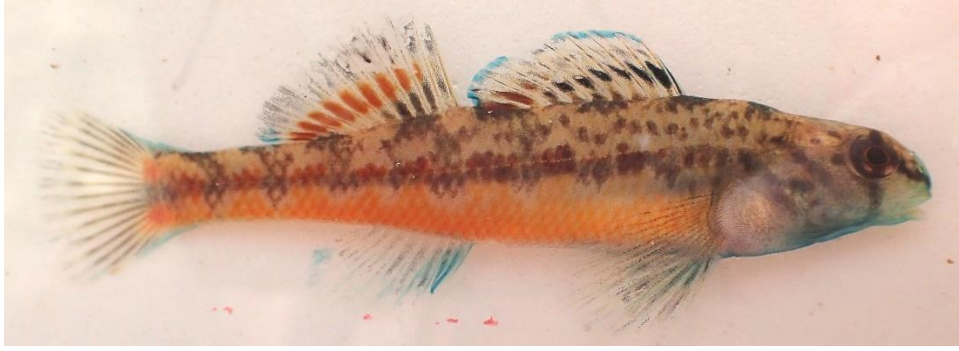

YD\_44

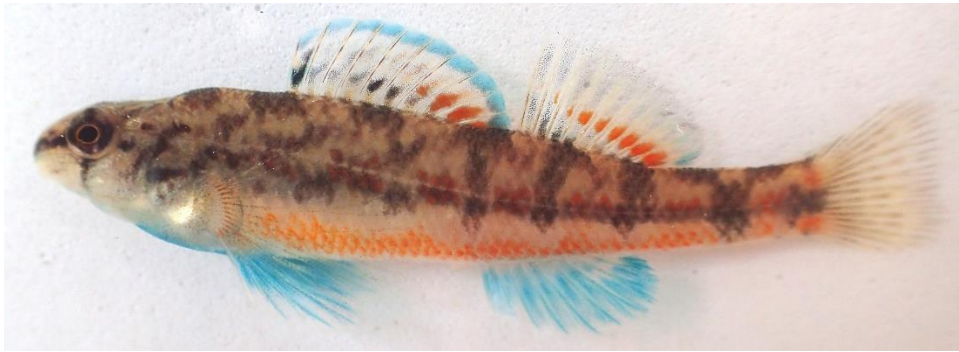

YD\_45

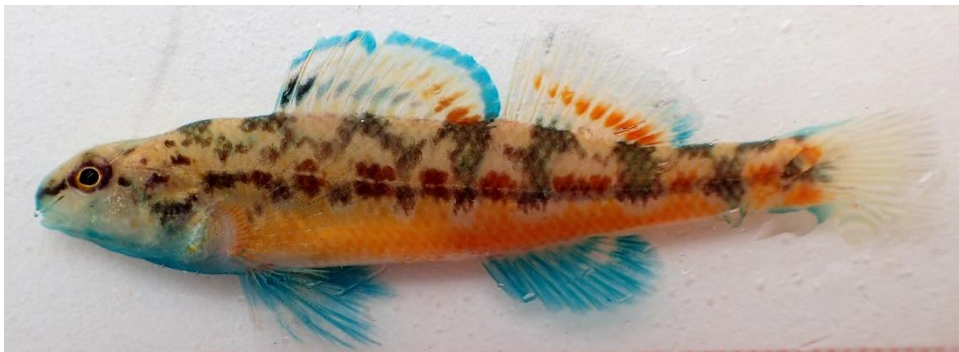

YD\_46

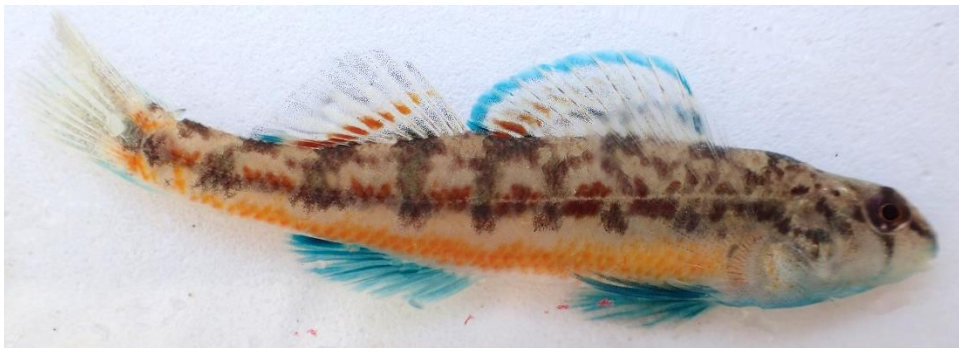

YD\_47

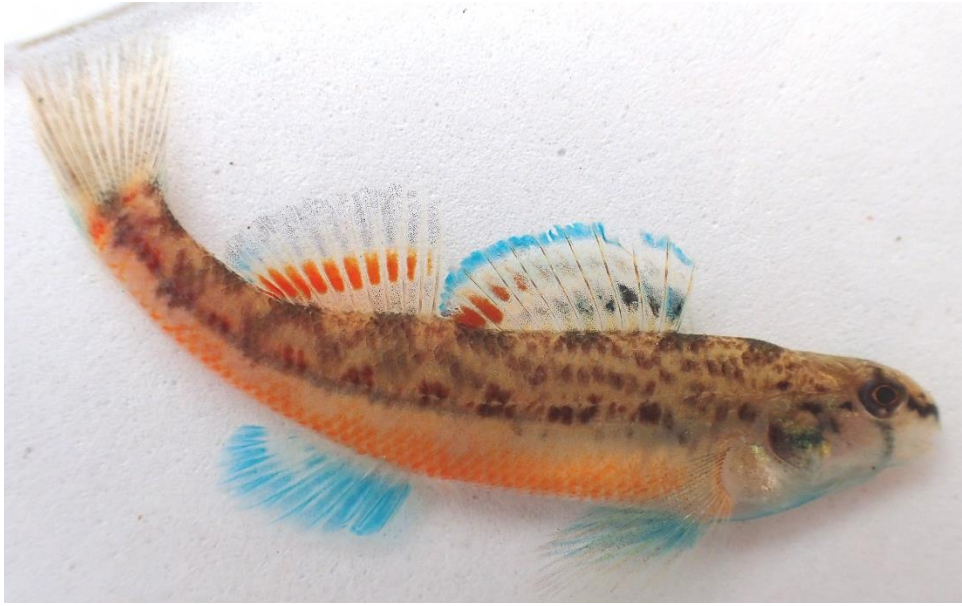

YD\_48

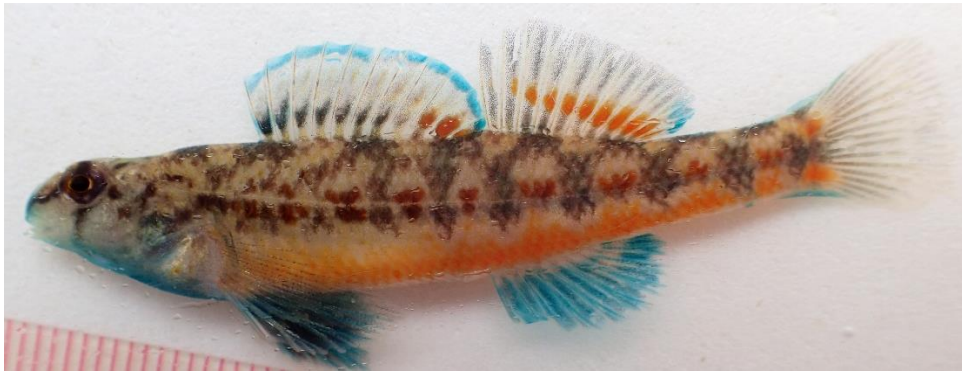

YD\_49

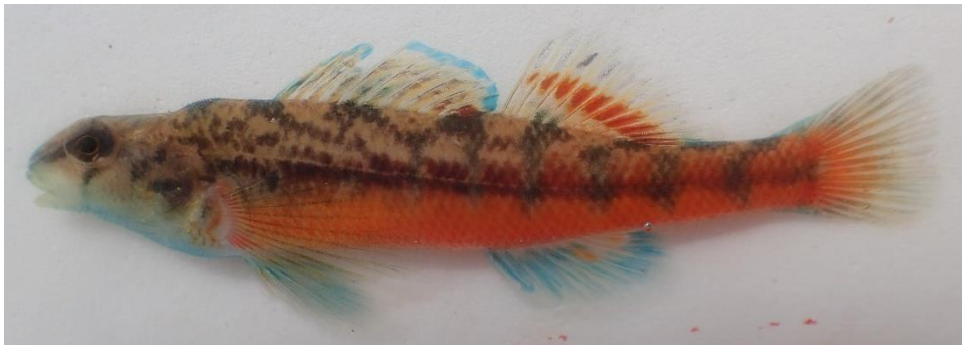

YD\_50

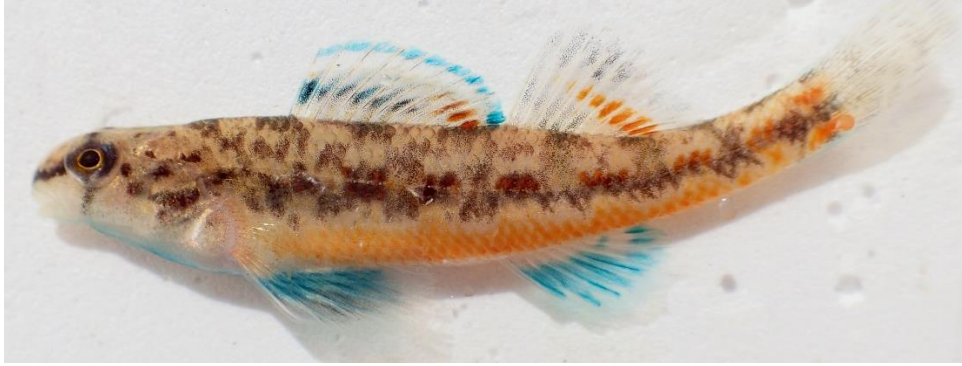

YD\_51

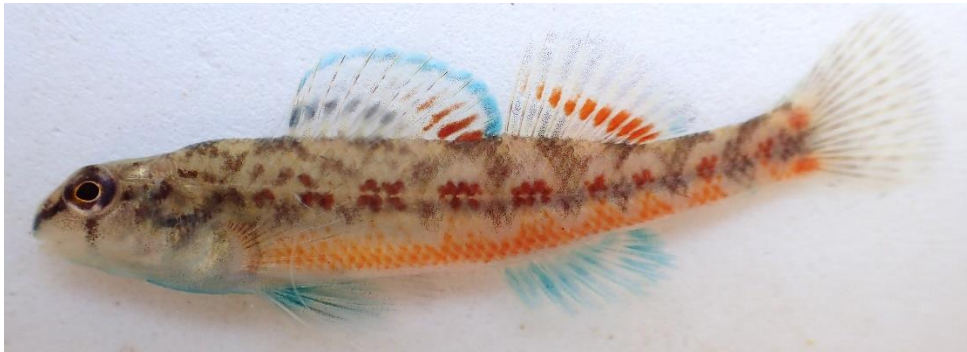

YD\_52

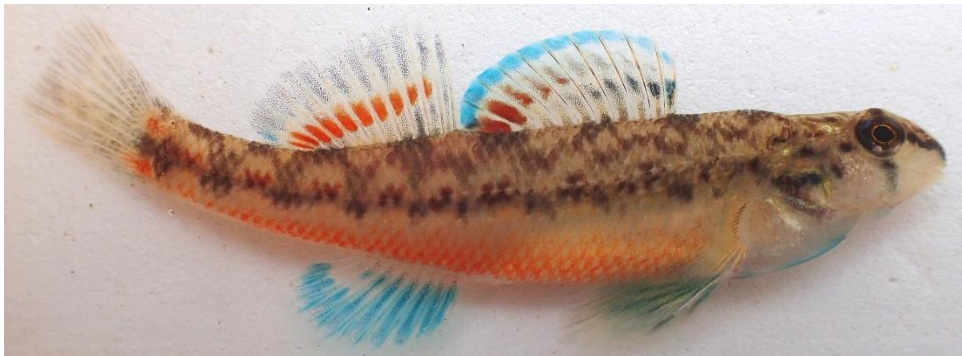

YD\_53

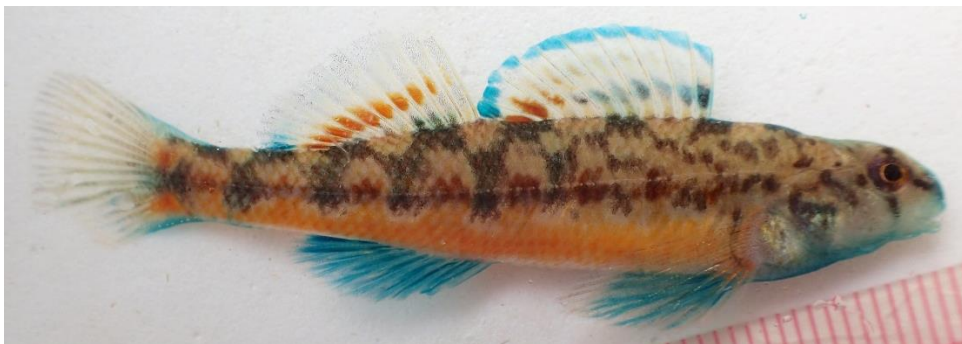

YD\_54

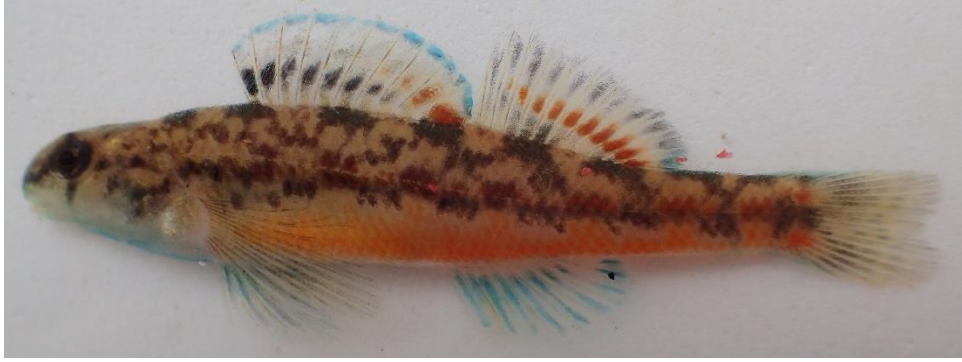

YD\_55

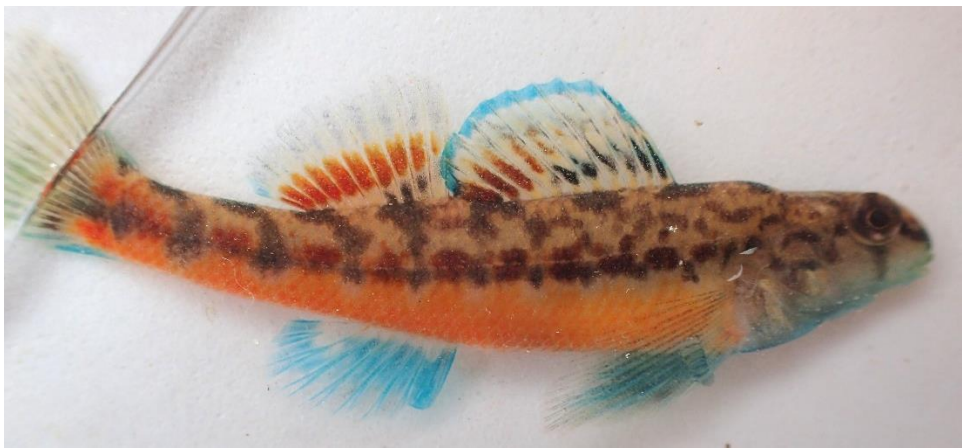

YD\_56

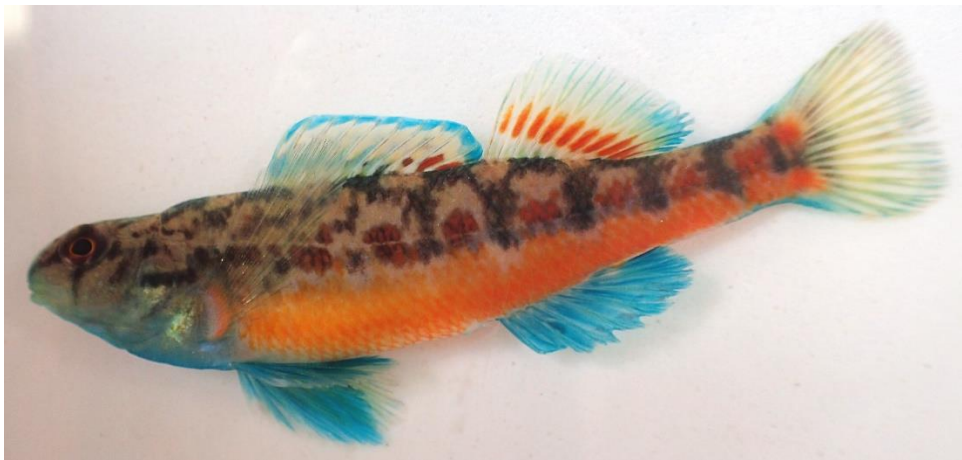

YD\_57



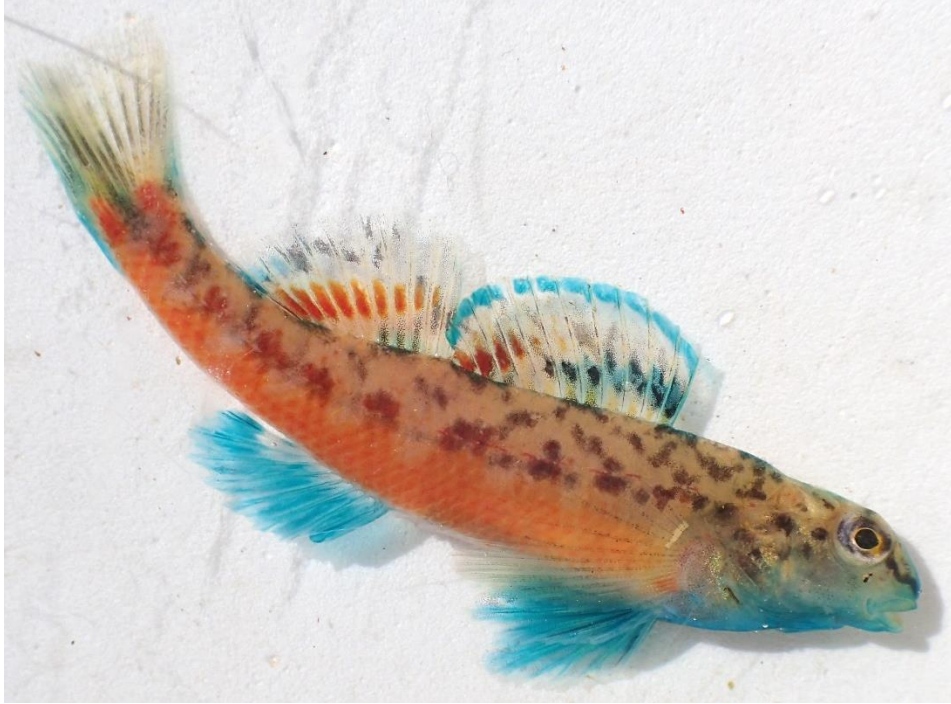

YD\_58

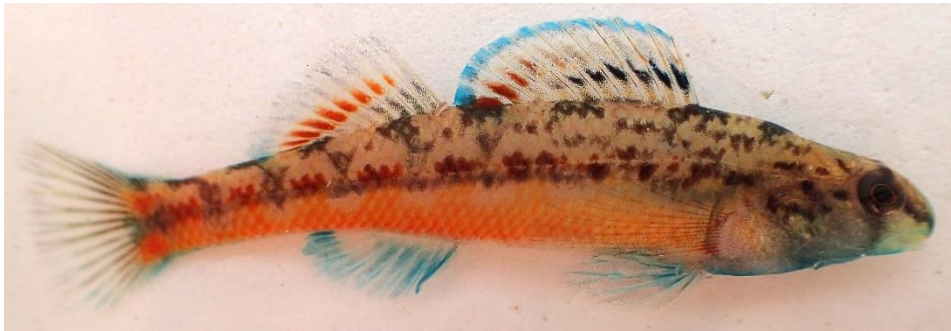

YD\_59

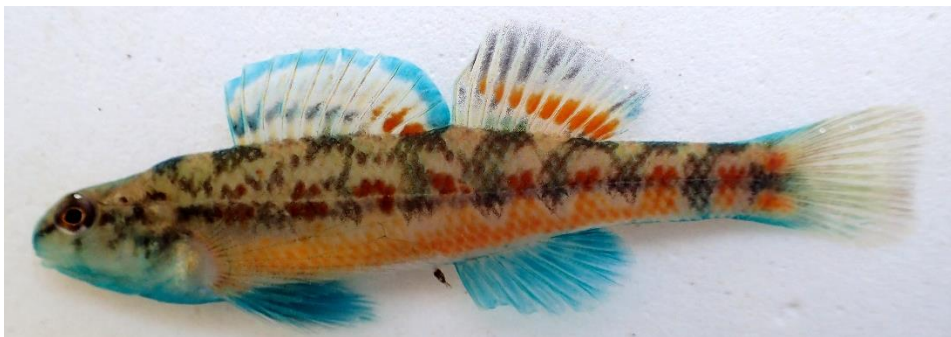

YD\_60

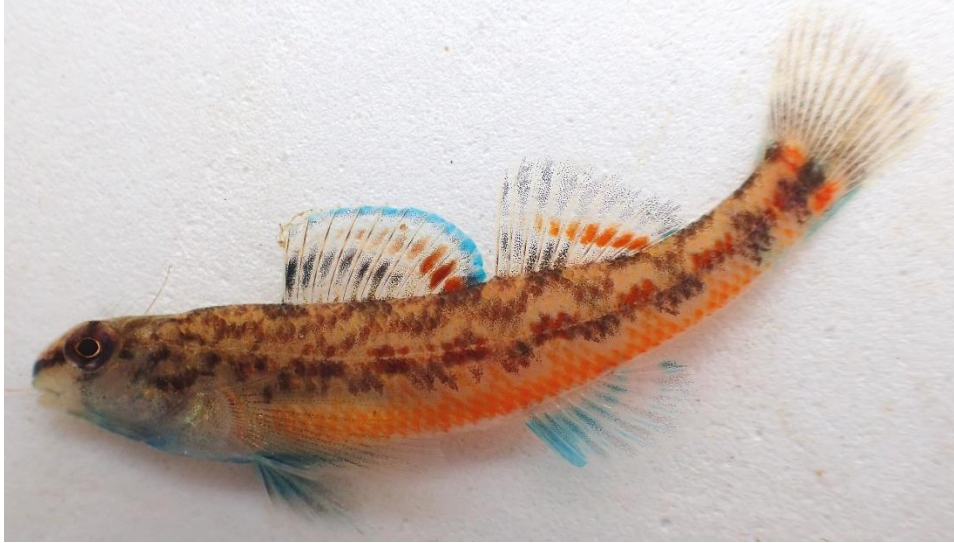

YD\_61

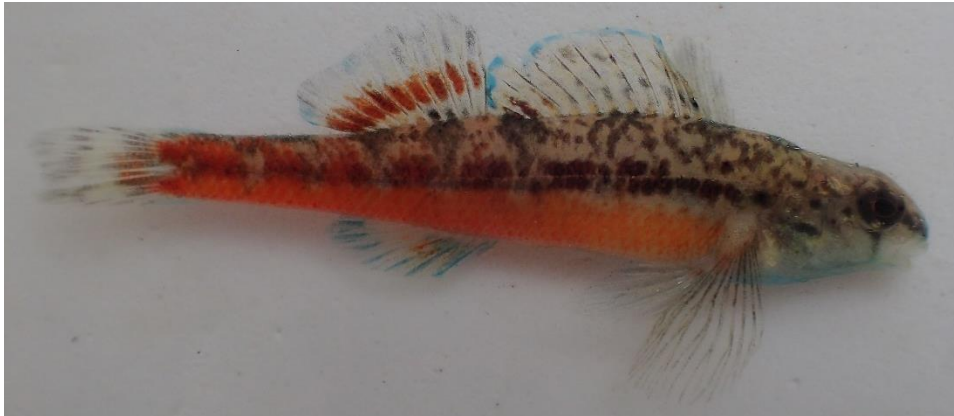

YD\_62

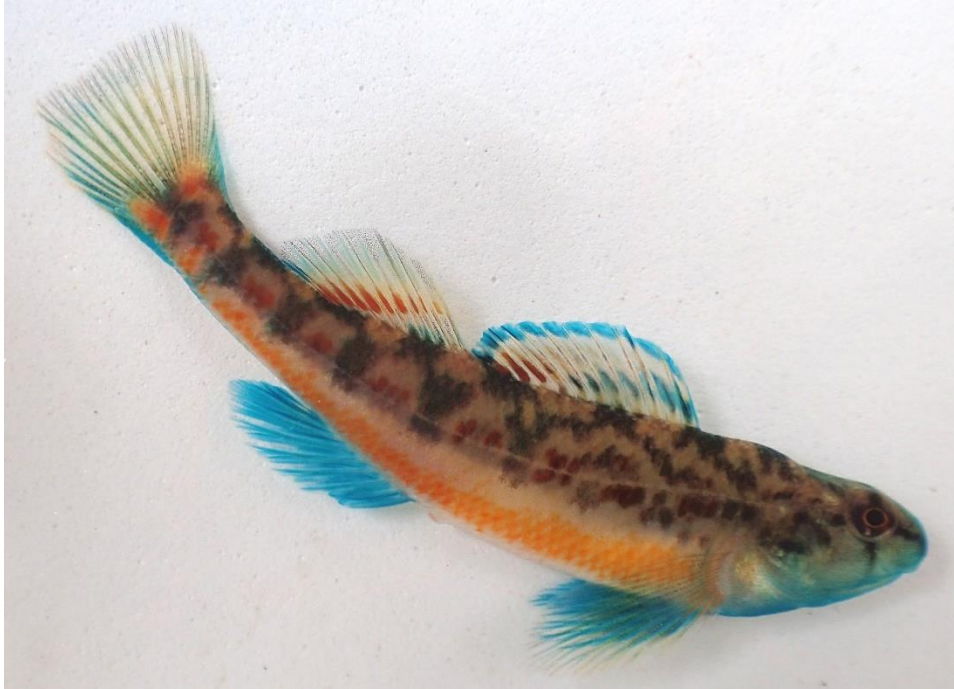

YD\_63

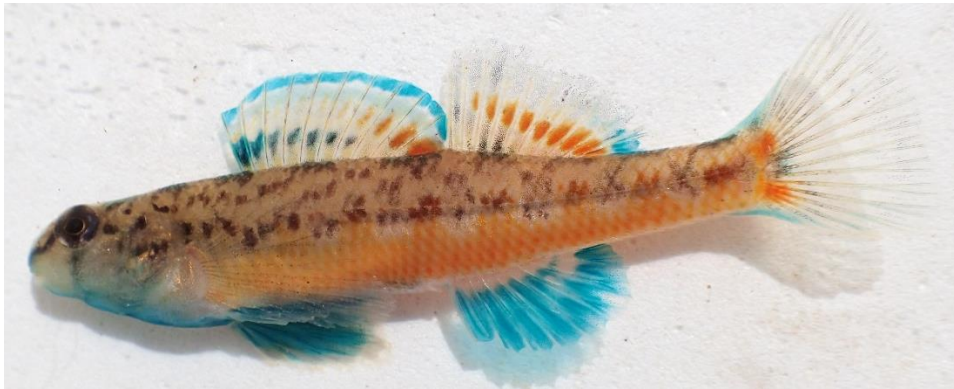

YD\_64

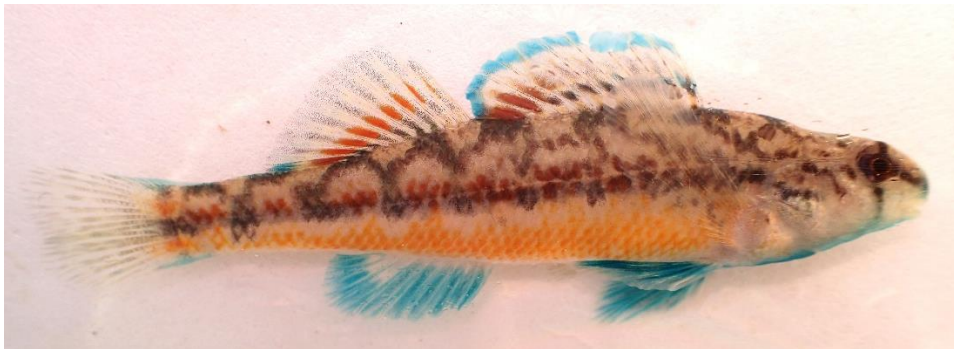

YD\_65

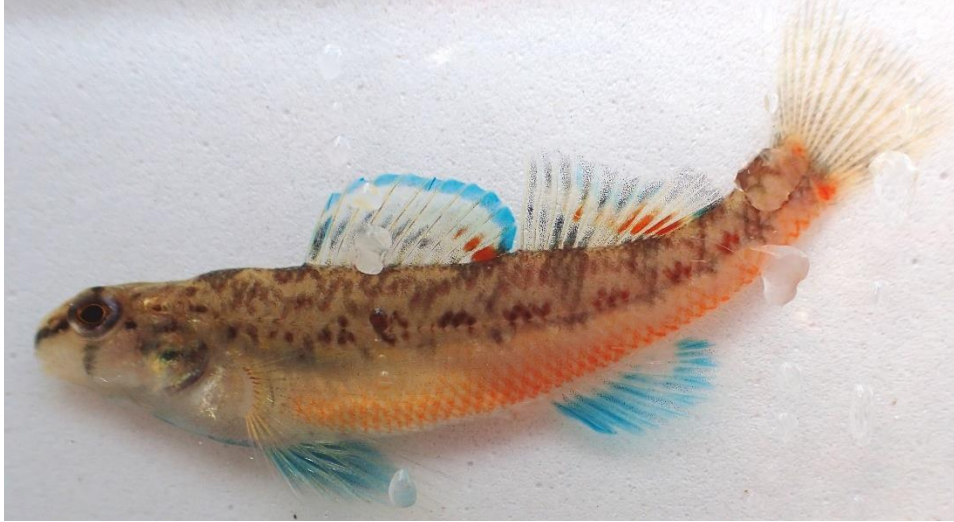

YD\_66

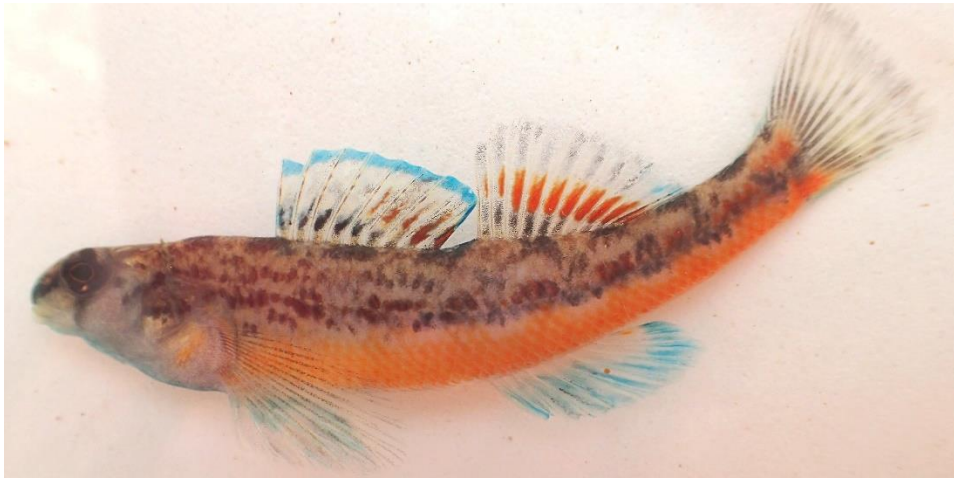

YD\_67

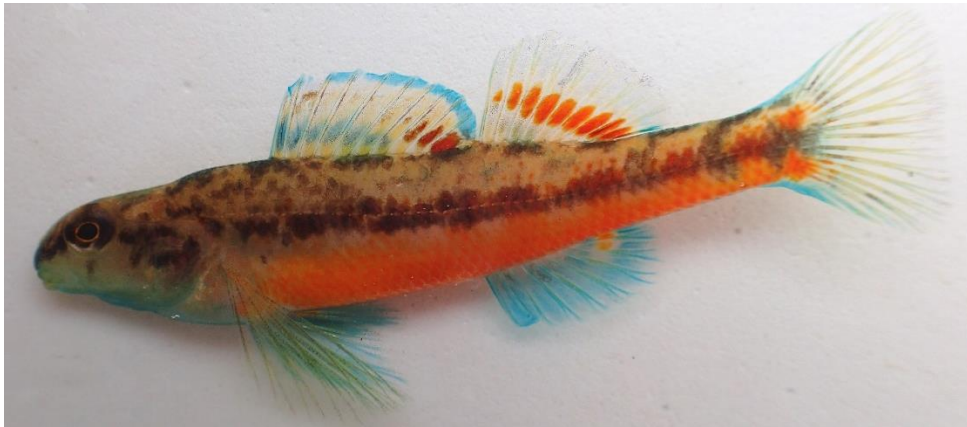

YD\_68

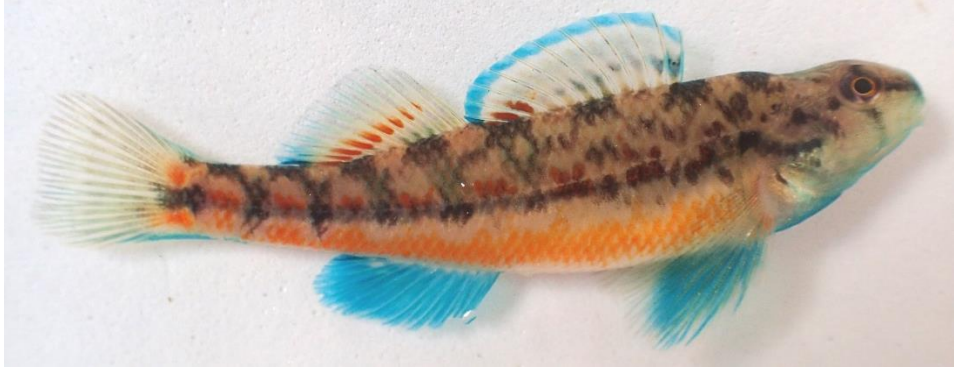

YD\_69

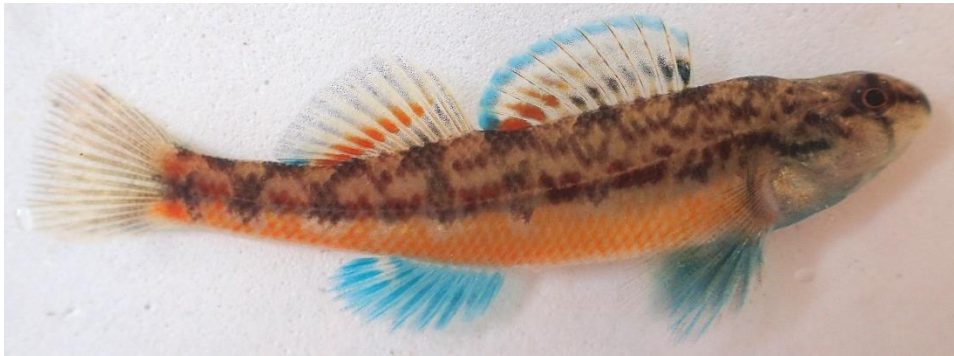

YD\_70

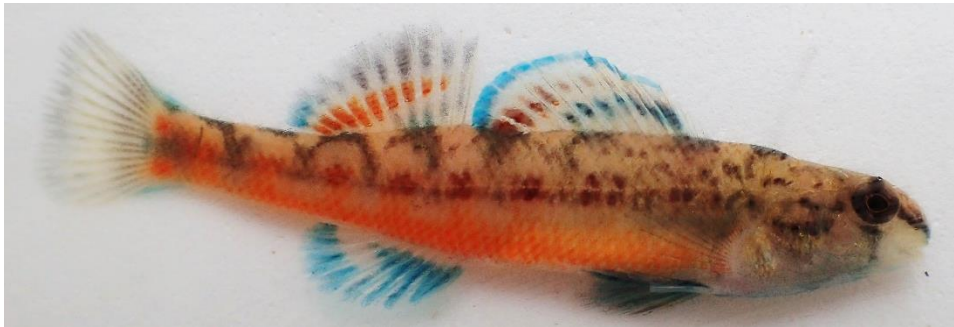

YD\_71

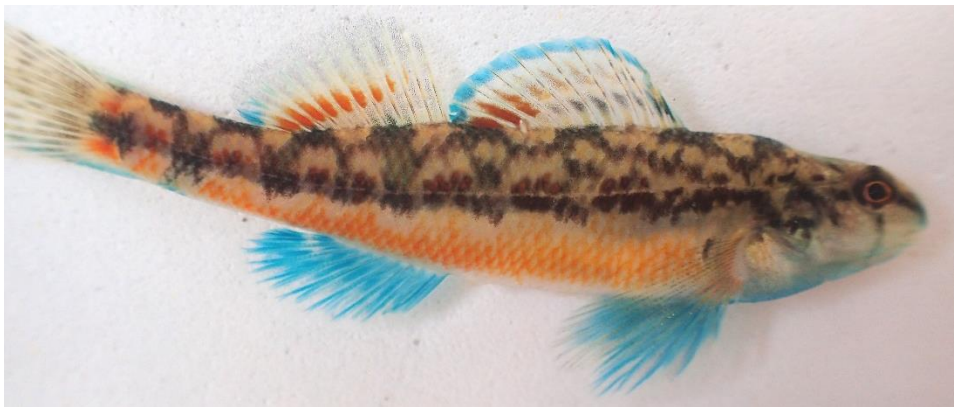

YD\_72

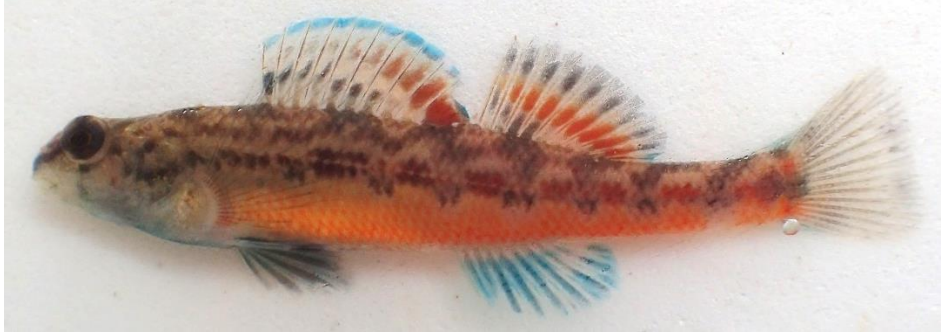

YD\_73

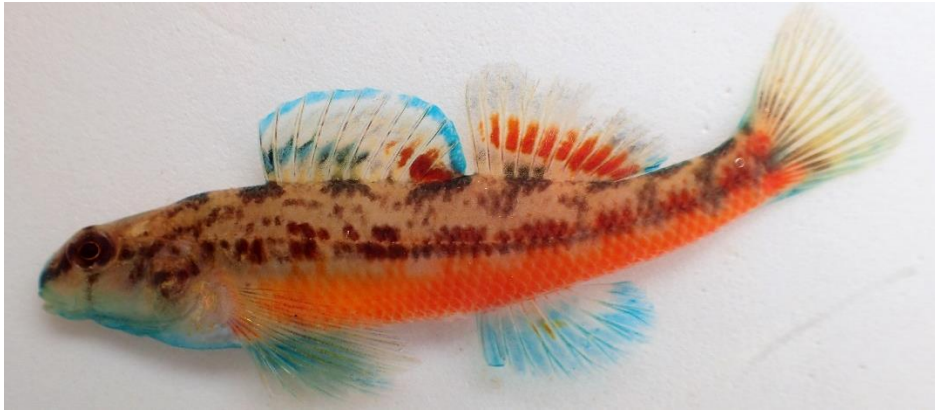

YD\_74

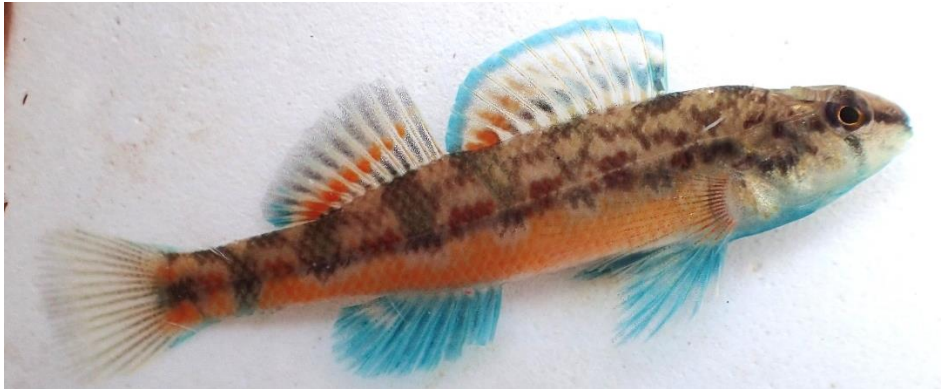

YD\_75

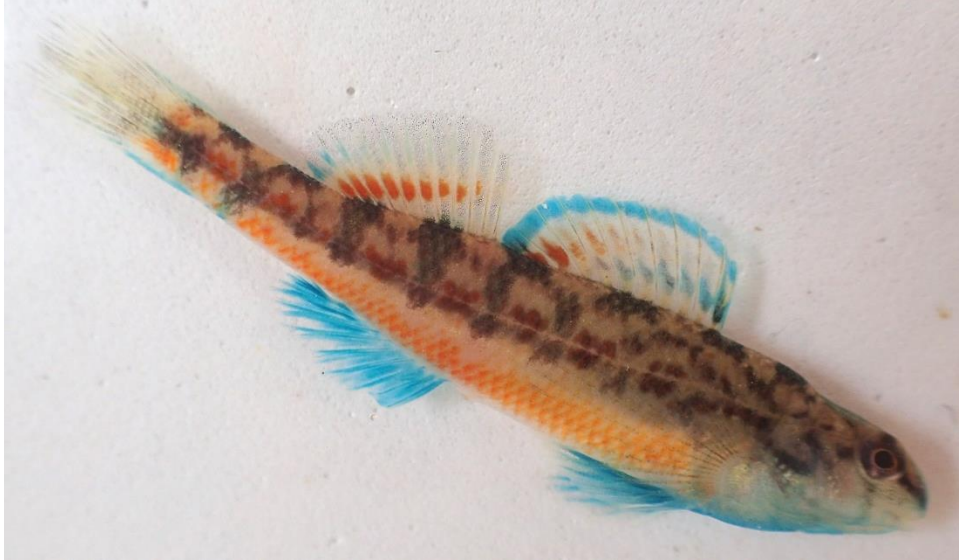

YD\_76

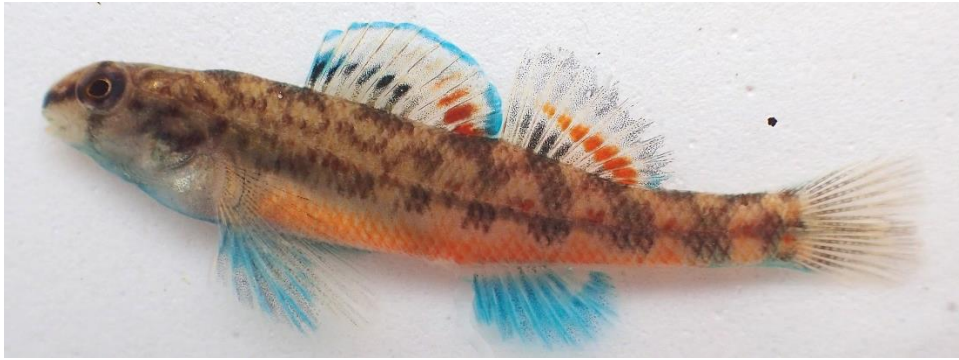

YD\_77

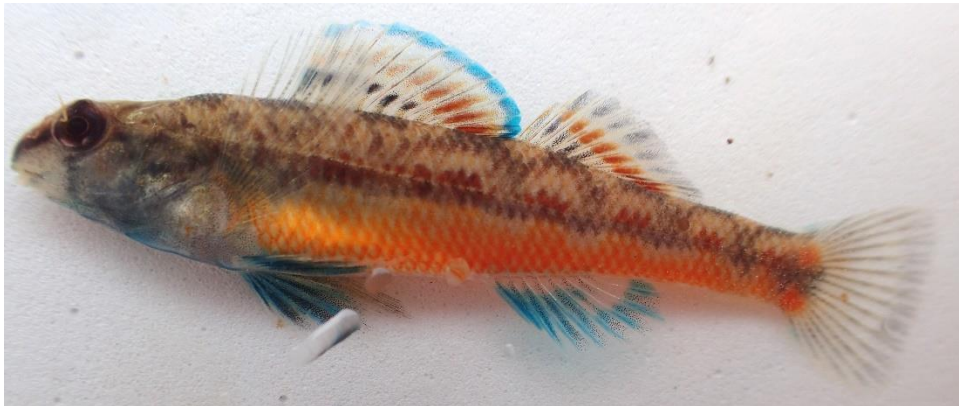

YD\_78

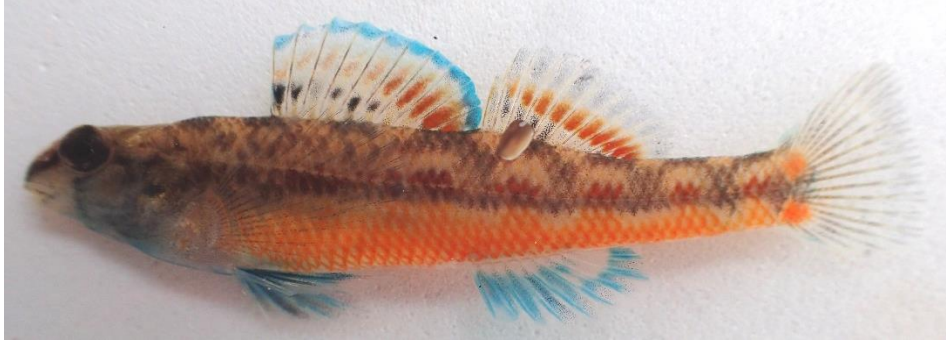

YD\_79

Key for location (drainage) data for each photograph; Y.R. = Yocona River drainage and L.T.R.  
= Little Tallahatchie River drainage

| Individual | Drainage |
|------------|----------|
| YD_1       | Y.R.     |
| YD_2       | L.T.R.   |
| YD_3       | L.T.R.   |
| YD_4       | Y.R.     |
| YD_5       | L.T.R.   |
| YD_6       | Y.R.     |
| YD_7       | Y.R.     |
| YD_8       | L.T.R.   |
| YD_9       | Y.R.     |
| YD_10      | Y.R.     |
| YD_11      | L.T.R.   |
| YD_12      | L.T.R.   |
| YD_13      | L.T.R.   |
| YD_14      | Y.R.     |
| YD_15      | L.T.R.   |
| YD_16      | L.T.R.   |
| YD_17      | Y.R.     |
| YD_18      | L.T.R.   |
| YD_19      | Y.R.     |
| YD_20      | Y.R.     |
| YD_21      | L.T.R.   |
| YD_22      | L.T.R.   |
| YD_23      | L.T.R.   |
| YD_24      | L.T.R.   |
| YD_25      | L.T.R.   |
| YD_26      | Y.R.     |



|       |        |
|-------|--------|
| YD_27 | L.T.R. |
| YD_28 | Y.R.   |
| YD_29 | Y.R.   |
| YD_30 | L.T.R. |
| YD_31 | L.T.R. |
| YD_32 | Y.R.   |
| YD_33 | L.T.R. |
| YD_34 | Y.R.   |
| YD_35 | Y.R.   |
| YD_36 | L.T.R. |
| YD_37 | L.T.R. |
| YD_38 | L.T.R. |
| YD_39 | L.T.R. |
| YD_40 | L.T.R. |
| YD_41 | L.T.R. |
| YD_42 | Y.R.   |
| YD_43 | Y.R.   |
| YD_44 | L.T.R. |
| YD_45 | Y.R.   |
| YD_46 | Y.R.   |
| YD_47 | Y.R.   |
| YD_48 | L.T.R. |
| YD_49 | Y.R.   |
| YD_50 | L.T.R. |
| YD_51 | L.T.R. |
| YD_52 | Y.R.   |
| YD_53 | L.T.R. |
| YD_54 | Y.R.   |
| YD_55 | L.T.R. |
| YD_56 | L.T.R. |
| YD_57 | Y.R.   |
| YD_58 | L.T.R. |
| YD_59 | L.T.R. |
| YD_60 | Y.R.   |
| YD_61 | L.T.R. |
| YD_62 | L.T.R. |
| YD_63 | Y.R.   |
| YD_64 | L.T.R. |
| YD_65 | Y.R.   |
| YD_66 | L.T.R. |
| YD_67 | L.T.R. |
| YD_68 | L.T.R. |
| YD_69 | Y.R.   |

|       |        |
|-------|--------|
| YD_70 | Y.R.   |
| YD_71 | L.T.R. |
| YD_72 | L.T.R. |
| YD_73 | L.T.R. |
| YD_74 | L.T.R. |
| YD_75 | Y.R.   |
| YD_76 | Y.R.   |
| YD_77 | Y.R.   |
| YD_78 | L.T.R. |
| YD_79 | L.T.R. |

### Literature Cited

- Adams, S.B. and M.L. Warren, Jr. 2005. Recolonization by warmwater fishes and crayfishes after severe drought in Upper Coastal Plain Hill streams. *Transactions of the American Fisheries Society* 134:1173-1192.
- Boschung, H.T. and R.L. Mayden. 2004. *Fishes of Alabama*. Smithsonian Books, Washington, D.C. 736 pp.
- Brogdon, S.M., C.R. Tabit and L.G. Kral. 2003. Population structure of the Tallapoosa Darter (*Etheostoma tallapoosae*). *Southeastern Naturalist*. 2:487-498.
- Gabel, J.M. 2007. Microsatellite analysis of genetic population structure and gene flow in populations of the federally threatened Cherokee Darter, *Etheostoma scotti*. Unpubl. PhD Dissertation. Duquesne University, Pittsburg, PA. 294 pp.
- Hubbell and Banford. 2019. Microhabitat use, spawning behavior, and spawning substrate use of the Tallapoosa Darter (*Etheostoma tallapoosae*). *American Midland Naturalist* 182:216–227.
- Johnston, C.E. and W.R. Haag. 1996. Life history of the Yazoo Darter (Percidae: *Etheostoma raneyi*), a species endemic to north-central Mississippi. *Tulane Studies in Zoology and Botany* 30:47-60.
- Kozal, L.C., J.W. Simmons, J.M. Mollish, D.J. MacGuigan, E. Benavides, B.P. Keck and T.J. Near. 2017. Phylogenetic and morphological diversity of the *Etheostoma zonistium* species complex with the description of a new species endemic to the Cumberland Plateau of Alabama. *Bulletin of the Peabody Museum of Natural History* 58:263-286.

- Ross, S.T. 2001. Inland Fishes of Mississippi. University Press of Mississippi, Jackson, MS. 624 pp.
- Sterling, K.A., M.L. Warren, Jr. and L.G. Henderson. 2013. Conservation assessment of the Yazoo Darter (*Etheostoma raneyi*). Southeastern Naturalist 12:816–184.
- Storey, C.M. 2003. Genetic population structure and life history aspects of the federally threatened Cherokee Darter, *Etheostoma scotti*. Unpublished thesis, the University of Georgia, Athens. 98 pp.
- Suttkus, R.D., R.M. Bailey, H.L. Bart, Jr. 1994. Three new species of *Etheostoma*, subgenus *Ulocentra*, from the Gulf Coastal Plain of southeastern United States. Tulane Studies in Zoology and Botany 29:97-126.
